# Supplementary material for: LAMC2 as a prognostic biomarker in human cancer: a systematic review and meta-analysis
Source: PubMed Central journal article supplement — BMJ Open. 2022 Nov 16;12(11):e063682. doi: 10.1136/bmjopen-2022-063682 (PMC9677043; doi:10.1136/bmjopen-2022-063682), 2022-11-16
Supplement: bmjopen-2022-063682.draft_revisions.pdf [file bmjopen-2022-063682.draft_revisions.pdf]

# BMJ Open

BMJ Open is committed to open peer review. As part of this commitment we make the peer review history of every article we publish publicly available.

When an article is published we post the peer reviewers' comments and the authors' responses online. We also post the versions of the paper that were used during peer review. These are the versions that the peer review comments apply to.

The versions of the paper that follow are the versions that were submitted during the peer review process. They are not the versions of record or the final published versions. They should not be cited or distributed as the published version of this manuscript.

BMJ Open is an open access journal and the full, final, typeset and author-corrected version of record of the manuscript is available on our site with no access controls, subscription charges or pay-per-view fees (<http://bmjopen.bmj.com>).

If you have any questions on BMJ Open's open peer review process please email [info.bmjopen@bmj.com](mailto:info.bmjopen@bmj.com)

# BMJ Open

## LAMC2 as a prognostic biomarker in human cancer: a systematic review and meta-analysis

|                               |                                                                                                                                                                                                                                                                                                                                                                                       |
|-------------------------------|---------------------------------------------------------------------------------------------------------------------------------------------------------------------------------------------------------------------------------------------------------------------------------------------------------------------------------------------------------------------------------------|
| Journal:                      | <i>BMJ Open</i>                                                                                                                                                                                                                                                                                                                                                                       |
| Manuscript ID                 | bmjopen-2022-063682                                                                                                                                                                                                                                                                                                                                                                   |
| Article Type:                 | Original research                                                                                                                                                                                                                                                                                                                                                                     |
| Date Submitted by the Author: | 07-Apr-2022                                                                                                                                                                                                                                                                                                                                                                           |
| Complete List of Authors:     | Fu, Tao; Chongqing Health Center for Women and Children<br>Liu, Jun-Xia; Chongqing Health Center for Women and Children<br>Xie, Juan; Chongqing Health Center for Women and Children<br>Gao, Zhen; College of Animal Veterinary Medicine, Northwest A & F University<br>Yang, Zhenshan; College of Veterinary Medicine, South China Agricultural University, Guangzhou, 510642, China |
| Keywords:                     | ONCOLOGY, Adult oncology < ONCOLOGY, Oncogenes < ONCOLOGY                                                                                                                                                                                                                                                                                                                             |
|                               |                                                                                                                                                                                                                                                                                                                                                                                       |

SCHOLARONE™  
Manuscripts

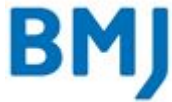

I, the Submitting Author has the right to grant and does grant on behalf of all authors of the Work (as defined in the below author licence), an exclusive licence and/or a non-exclusive licence for contributions from authors who are: i) UK Crown employees; ii) where BMJ has agreed a CC-BY licence shall apply, and/or iii) in accordance with the terms applicable for US Federal Government officers or employees acting as part of their official duties; on a worldwide, perpetual, irrevocable, royalty-free basis to BMJ Publishing Group Ltd ("BMJ") its licensees and where the relevant Journal is co-owned by BMJ to the co-owners of the Journal, to publish the Work in this journal and any other BMJ products and to exploit all rights, as set out in our [licence](#).

The Submitting Author accepts and understands that any supply made under these terms is made by BMJ to the Submitting Author unless you are acting as an employee on behalf of your employer or a postgraduate student of an affiliated institution which is paying any applicable article publishing charge ("APC") for Open Access articles. Where the Submitting Author wishes to make the Work available on an Open Access basis (and intends to pay the relevant APC), the terms of reuse of such Open Access shall be governed by a Creative Commons licence – details of these licences and which [Creative Commons](#) licence will apply to this Work are set out in our licence referred to above.

Other than as permitted in any relevant BMJ Author's Self Archiving Policies, I confirm this Work has not been accepted for publication elsewhere, is not being considered for publication elsewhere and does not duplicate material already published. I confirm all authors consent to publication of this Work and authorise the granting of this licence.

1  
2  
3  
4 **1 LAMC2 as a prognostic biomarker in human cancer: a systematic review and meta-analysis**  
5  
6  
7  
8

9 3 Tao Fu,<sup>1</sup> Jun-Xia Liu,<sup>1</sup> Juan Xie,<sup>1</sup> Zhen Gao,<sup>2</sup> Zhen-Shan Yang<sup>3\*</sup>  
10  
11  
12 4

13  
14 5 <sup>1</sup> Chongqing Key Laboratory of Human Embryo Engineering, Chongqing Reproductive and  
15  
16  
17 6 Genetics Institute, Chongqing Health Center for Women and Children, Chongqing, China  
18

19 7 <sup>2</sup> Key Laboratory of Animal Biotechnology, Ministry of Agriculture, College of Animal  
20  
21  
22 8 Veterinary Medicine, Northwest A & F University, Yangling 712100, China  
23

24 9 <sup>3</sup> College of Veterinary Medicine, South China Agricultural University, Guangzhou, 510642,  
25  
26  
27 10 China  
28  
29

30  
31  
32 11  
33 12 \*Correspondence  
34

35 13 Zhen-Shan Yang, MD, College of Veterinary Medicine, South China Agricultural University,  
36  
37  
38 14 Guangzhou, 510642, China.  
39

40 15 Email: le1730@stu.scau.edu.cn  
41  
42  
43 16  
44

45 17 Word count: 2269 words.  
46  
47  
48 18  
49

50  
51 **19 ABSTRACT**  
52

53 20 **Objectives** Accumulating evidence suggested that the laminin  $\gamma$ 2 (LAMC2) expression level was  
54  
55  
56 21 upregulated in various cancers. However, the potential prognostic value of LAMC2 in cancers  
57  
58  
59 22 remains unclear. We conducted a meta-analysis to clarify the association of LAMC2 expression  
60

1  
2  
3  
4 23 with prognosis.

5  
6 24 **Method** We searched Embase, Web of Science, and PubMed through 25 November 2021 to  
7  
8  
9 25 collect all eligible studies, and meta-analysis was performed to interpret the association of  
10  
11  
12 26 LAMC2 expression with clinicopathological parameters, overall survival (OS) disease-specific  
13  
14  
15 27 survival (DSS), and progression-free survival (PFS).

16  
17 28 **Results** Seven studies were included finally. We found that increased LAMC2 expression was  
18  
19  
20 29 significantly associated with lymph node metastasis (Log odds ratio [OR]: 0.88, 95% confidence  
21  
22 30 interval [CI]: 0.38-1.38,  $p = 0.00$ ), tumor-node-metastasis stages (Log OR: 0.95, 95% CI:  
23  
24 31 0.39-1.50,  $P = 0.00$ ), and tumor status (Log OR: 1.26, 95% CI: 0.84-1.68,  $p = 0.00$ ), but not with  
25  
26  
27 32 age (Log OR: -0.05, 95% CI: -0.37-0.27,  $p = 0.75$ ) or gender (Log OR: -0.07, 95% CI: -0.52-0.38,  
28  
29  
30 33  $p = 0.75$ ). In addition, higher LAMC2 expression was found to be significantly associated with  
31  
32  
33 34 OS/PFS/DSS (HR: 1.85, 95% CI: 1.31-2.40,  $p = 0.00$ ). A similar result was found from The  
34  
35  
36 35 Cancer Genome Atlas (TCGA) database.

37  
38 36 **Conclusion** Our results suggested that higher LAMC2 expression was correlated with worse  
39  
40  
41 37 survival. This study was subject to inherent limitations, but the results presented here provided  
42  
43  
44 38 insights regarding the potential use of LAMC2 as a biomarker for human cancer.

45  
46 39 **Study registration** [researchregistry.com](http://researchregistry.com) (researchregistry1319).

47  
48  
49 40

#### 50 51 41 **Strengths and limitations of this study**

52  
53  
54 42 This systematic review and meta-analysis provides a comprehensive literature published up to  
55  
56  
57 43 November 2020 was performed in Embase, Web of Science, and PubMed.

58  
59 44 This study adheres to Preferred Reporting Items for Systematic Reviews and Meta-Analyses guide  
60

1  
2  
3  
4 45 lines.

5  
6 46 Additional data sources such as grey literature were not searched.

7  
8  
9 47

10  
11 48 **KEY WORDS**

12  
13  
14 49 Cancer, Laminin  $\gamma$ 2 (LAMC2), Meta-analysis, Prognosis

15  
16  
17 50

18  
19 51 **INTRODUCTION**

20  
21  
22 52 Laminins are trimeric proteins composed of  $\alpha$ ,  $\beta$ , and  $\gamma$  chains which are the main component of  
23  
24 53 basement membranes.<sup>1</sup> Mammalian genomes encode five  $\alpha$  chains, four  $\beta$  chains, and three  $\gamma$   
25  
26 54 chains.<sup>2</sup> Loss-of-function studies show that most laminin mutants are embryonic lethal.<sup>3</sup> Laminins  
27  
28 55 are involved in various biological processes, including cellular phenotype maintenance, adhesion,  
29  
30 56 migration, growth, and differentiation *in vivo* and *in vitro*.<sup>4,5</sup>

31  
32  
33  
34  
35 57

36  
37  
38 58 In recent years, laminin  $\gamma$ 2 (LAMC2) has attracted increasingly attractive because of the  
39  
40 59 aberrant expression of LAMC2 in various cancer. The LAMC2 expression was significantly  
41  
42 60 upregulated in colorectal cancer tissues compared with adjacent normal tissues and high LAMC2  
43  
44 61 expression is known to be associated with poor patient prognosis.<sup>6</sup> Furthermore, overexpression of  
45  
46 62 LAMC2 has been reported in pancreatic ductal adenocarcinoma,<sup>7-10</sup> non-small cell lung cancer,<sup>11</sup>  
47  
48 63 penile squamous cell carcinoma,<sup>12</sup> ovarian cancer,<sup>13</sup> Oral tongue squamous cell carcinoma,<sup>14</sup>  
49  
50 64 Cholangiocarcinoma,<sup>15</sup> esophageal squamous cell carcinoma,<sup>16</sup> leading to poor clinicopathological  
51  
52  
53  
54  
55  
56 65 features and short survival time.

57  
58  
59 66  
60

1  
2  
3  
4 67 However, individual studies may be inadequate and inaccurate due to their small sample and  
5  
6 68 study design. To date, there was no meta-analysis has been performed to investigate the  
7  
8  
9 69 relationship between LAMC2 and the prognostic value. Therefore, we performed a comprehensive  
10  
11 70 meta-analysis to assess the correlation between LAMC2 and survival outcomes and  
12  
13  
14 71 clinicopathological features in human cancers.  
15  
16  
17 72

## 19 73 **METHODS**

22 74 This study was followed the Preferred Reporting Items for Systematic Reviews and  
23  
24 75 Meta-Analyses guidelines<sup>17</sup> (online supplemental table S1). and the protocol was published on  
25  
26  
27 76 Research Registry (researchregistry1319).  
28  
29  
30 77

### 32 78 **Search strategy**

35 79 A literature search was conducted in Embase, Web of Science, and PubMed through 25 November  
36  
37 80 2021. The keywords were (laminin C2 OR LAMC2 OR laminin subunit gamma 2) AND  
38  
39  
40 81 (prognosis OR prognostic OR survival). The reference lists and citation sections of relevant  
41  
42  
43 82 studies were also screened for additional eligible studies.  
44  
45  
46 83

### 48 84 **Study selection**

51 85 Studies that met the following criteria were included in the meta-analysis: (1) study of the  
52  
53 86 relationship between LAMC2 and prognosis of cancers, (2) patients were divided into two groups:  
54  
55  
56 87 high LAMC2 expression and low LAM2 expression group, and (3) associations of LAMC2  
57  
58  
59 88 expression with overall survival and clinicopathologic features were described. The exclusion  
60

1  
2  
3  
4 89 criteria in our meta-analysis were as follows: (1) case reports, letters, reviews, editorials, and  
5  
6 90 expert opinions, (2) studies published non-English language, (3) non-human studies, and (4)  
7  
8  
9 91 studies without sufficient available data.  
10

### 11 92 12 13 14 93 **Quality assessment**

15  
16  
17 94 The Newcastle-Ottawa Quality Assessment Scale (NOS) criteria was used to assess the quality of  
18  
19 95 the eligible studies.<sup>18</sup> The NOS contains nine items that include selection, comparability, and  
20  
21  
22 96 outcome for studies. When the NOS score was  $\geq 6$ , the study was considered high quality.  
23  
24  
25 97

### 26 27 98 **Data extraction**

28  
29  
30 99 Two authors (T.F. and Z.-S.Y.) performed the data extraction independently. Disagreements were  
31  
32 100 resolved by discussion and consensus with the third author (J.X.). The following information from  
33  
34  
35 101 the included studies was collected: the first author's name, publication year, country, number of  
36  
37  
38 102 cases, cancer type, the detection method of LAMC2, clinicopathological features, and survival  
39  
40  
41 103 outcome. When multivariate and univariate analyses were simultaneously reported, only the  
42  
43 104 former was extracted. If studies only provided Kaplan-Meier curves, the survival data were  
44  
45  
46 105 extracted from the graphical curve and calculated HR and 95% CI were reckoned using the  
47  
48 106 published method.<sup>19</sup>  
49

### 50 51 107 52 53 108 **Public data and tools**

54  
55  
56 109 The web-based tool named Gene Expression Profiling Interactive Analysis (GEPIA) was used to  
57  
58 110 analyze associations between LAMC2 and clinical outcomes.<sup>20</sup>  
59  
60



1  
2  
3  
4 1115  
6 112 **Statistical analysis**

7  
8  
9 113 We used Stata MP 16 software (Stata, College Station, TX) to perform statistical analysis. Log  
10  
11 114 odds ratio (OR) and 95% confidence interval (CI) were calculated for the association LAMC2  
12  
13 115 expression and clinicopathological characteristics. The prognostic role of LAMC2 expression in  
14  
15 116 overall survival (OS), disease-specific survival (DSS), and progression-free survival (PFS) was  
16  
17 117 evaluated through HR with 95% CI. The statistical heterogeneity among the studies was analyzed  
18  
19 118 by using  $I^2$  test and Q test. When significant heterogeneity ( $I^2 \geq 50\%$ ,  $p < 0.05$ ) was observed,  
20  
21 119 the random-effects model was chosen. Otherwise, the fixed-effects model was used. The Egger's  
22  
23 120 test and Begg's test were used to assessing the potential publication bias. We conducted a  
24  
25 121 sensitivity analysis to explore the stability of the overall meta-analysis results.  $p < 0.05$  was  
26  
27 122 considered as statistically significant.  
28  
29  
30  
31  
32  
33  
34

35 123

36  
37 124 **RESULTS**38  
39 125 **Study identification and characteristics**

40  
41  
42 126 As is shown in Figure 1, a total of seven studies with 1,056 patients with cancer were included in  
43  
44 127 this meta-analysis satisfied the inclusion criteria.<sup>6, 7, 15, 16, 21-23</sup> The publication period ranged from  
45  
46 128 2017-2021. All of our included studies had high quality with Newcastle-Ottawa Quality  
47  
48 129 Assessment Scale scores  $\geq 6$ . The included studies addressed six different cancer types:  
49  
50 130 esophageal squamous cell carcinoma (n = 1), pancreatic ductal adenocarcinoma (n = 2),  
51  
52 131 cholangiocarcinoma (n = 1), papillary thyroid cancer (n = 1), colorectal cancer (n = 1), and penile  
53  
54 132 squamous cell carcinoma (n = 1). The main characteristics of the seven studies are summarized in  
55  
56  
57  
58  
59  
60

1  
2  
3  
4 133 Table 1.

5  
6  
7 134

8  
9 135 **Table 1 Characteristics of studies included in this meta-analysis**

| Study        | Year | Region | Sample | Cancer                             | Method  | Outcome | NOS score |
|--------------|------|--------|--------|------------------------------------|---------|---------|-----------|
| Okada et al. | 2021 | Japan  | 114    | pancreatic ductal adenocarcinoma   | qRT-PCR | OS      | 8         |
| Okada et al. | 2021 | Japan  | 121    | pancreatic ductal adenocarcinoma   | qRT-PCR | OS      | 8         |
| Pei et al.   | 2019 | China  | 121    | cholangiocarcinoma                 | IHC     | -       | 7         |
| Liang et al. | 2018 | China  | 64     | esophageal squamous cell carcinoma | qRT-PCR | OS      | 7         |
| Zhan et al.  | 2019 | China  | 473    | papillary Thyroid Cancer           | RNA-seq | PFS     | 6         |
| Zhou et al.  | 2018 | China  | 114    | penile squamous cell carcinoma     | IHC     | DSS     | 7         |
| Huang et al. | 2017 | China  | 49     | colorectal cancer                  | IHC     | -       | 6         |

10  
11  
12  
13  
14  
15  
16  
17  
18  
19  
20  
21  
22  
23  
24  
25  
26  
27  
28  
29  
30  
31  
32  
33  
34  
35  
36 136 Abbreviations: DSS, disease-specific survival; IHC, immunocytochemistry; NOS,

37  
38 137 Newcastle-Ottawa scale; OS, overall survival; PFS, progression-free survival; qRT-PCR,

39  
40  
41 138 quantitative real-time polymerase chain reaction.

42  
43  
44 139

45  
46  
47 140 **Relationship between LAMC2 expression and clinicopathological parameters**

48  
49 141 We evaluated the relationship between LAMC2 expression and clinicopathological parameters

50  
51 142 in various cancers. As shown in Figures 2A and B, there were three and six studies describing

52  
53 143 patients of age and gender, respectively. The pooled analysis demonstrated that there was no

54  
55 144 significant association between LAMC2 expression and age or gender. High expression of

56  
57  
58  
59 145 LAMC2 was significantly associated with lymph node metastasis (LNM) (Log OR: 0.88, 95% CI:

1  
2  
3  
4 146 0.38-1.38,  $p = 0.00$ , Figure 2C) and tumor-node-metastasis (TNM) stage (Log OR: 0.95, 95% CI:  
5  
6 147 0.39-1.50,  $p = 0.00$ , Figure 2D). There was significant heterogeneity among these studies ( $I^2 =$   
7  
8  
9 148 59.61%,  $P = 0.02$ ;  $I^2 = 60.16%$ ,  $p = 0.03$ ), and thus the random-effects DerSimonian-Laird model  
10  
11  
12 149 was adopted. A total of four studies evaluated tumor status according to LAMC2 expression. No  
13  
14  
15 150 statistically significant heterogeneity was found among the studies ( $I^2 = 36.00%$ ,  $p = 0.20$ ); thus,  
16  
17 151 the fixed-effect Mantel-Haenszel model was adopted. As shown in Figure 2E, high expression of  
18  
19  
20 152 LAMC2 was significantly associated with tumor status (Log OR: 1.26, 95% CI: 0.84-1.68,  $p =$   
21  
22 153 0.00). This finding suggests that high LAMC2 expression is associated with clinicopathological  
23  
24  
25 154 features.  
26  
27  
28  
29

### 30 156 **Relationship between LAMC2 expression and OS/PFS/DSS**

31  
32  
33 157 There were five studies including 872 patients presenting the relationship between LAMC2 and  
34  
35 158 OS/PFS/DSS. Due to no significant heterogeneity being found among studies ( $I^2 = 0.00%$ ,  $p =$   
36  
37  
38 159 0.83), the fixed-effect inverse-variance model was adopted to estimate the pooled HR and 95% CI.  
39  
40  
41 160 The pooled HR indicated that the expression of LAMC2 was negatively associated with  
42  
43 161 OS/PFS/DSS (HR: 1.85, 95% CI: 1.31-2.40,  $p = 0.00$ , Figure 3A), which demonstrated that  
44  
45 162 LAMC2 was a risk factor for the prognosis of cancer patients. In addition, sensitivity analysis was  
46  
47  
48 163 performed to determine the effect of individual studies on the OS/PFS/DSS. It revealed that no  
49  
50  
51 164 single study altered the pooled LAMC2 HR result significantly (Figure 3B). This suggested that  
52  
53 165 the result of the meta-analysis was stable.  
54  
55

### 56 166 57 58 167 **Analysis of publication bias**

1  
2  
3  
4 168 Funnel plot (Figure 3C), Begg's test, and Egger's linear regression test (Figure 3D) were used to  
5  
6 169 assess publication bias. The results showed that the funnel plots scatter symmetrically. The  
7  
8  
9 170 statistical tests showed  $P$  values were greater than 0.05 (Begg's test:  $p = 0.4624$ ; Egger's test:  $p =$   
10  
11 171 0.329). Thus, there was no obvious publication bias in prognostic meta-analysis.  
12  
13

14 172

### 17 173 **Validation of TCGA data set results**

18  
19 174 To validate our result, we retrieved LAMC2 expression data and clinical data from the TCGA  
20  
21  
22 175 dataset. As shown in Figure 4A, LAMC2 was increased in colon adenocarcinoma (COAD),  
23  
24  
25 176 lymphoid neoplasm diffuse large B-cell lymphoma (DLBC), esophageal carcinoma (ESCA), head  
26  
27  
28 177 and neck squamous cell carcinoma (HNSC), lung adenocarcinoma (LUAD), and lung squamous  
29  
30 178 cell carcinoma (LUSC), determined using a log<sub>2</sub>FC cutoff of 1 and a p-value cutoff of 0.01. A  
31  
32  
33 179 total of 9502 patients with urinary, digestive, female reproductive, respiratory, and blood systems  
34  
35  
36 180 cancers were included in the survival analysis from the TCGA database. According to the  
37  
38 181 expression of LAMC2, the patients were divided into high and low groups using the median score  
39  
40 182 as the cutoff by GEPIA<sup>20</sup>. The results showed that higher LAMC2 expression was correlated with  
41  
42  
43 183 worse survival (Figure 4B). We also explored the prognostic role of LAMC2 in different cancer  
44  
45  
46 184 types. As shown in Figure 5, LAMC2 expression was significantly associated with OS in LUAD  
47  
48 185 (Figure 5A), mesothelioma (MESO, Figure 5C), skin cutaneous melanoma (SKCM, Figure 5D),  
49  
50  
51 186 HNSC (Figure 5E), and brain lower grade glioma (LGG, Figure 5F). However, LAMC2  
52  
53 187 expression was not related to OS in LUSC (Figure 5B).  
54  
55

56 188

### 58 189 **DISCUSSION**

59  
60

1  
2  
3  
4 190 Laminins are involved in various cancer development and prognosis.<sup>24, 25</sup> Increasing evidence  
5  
6 191 suggests that the various laminin isoforms could be useful biomarkers of cancer diagnosis and  
7  
8  
9 192 might be potential therapeutic targets for cancers treatment, such as LAMA5,<sup>26</sup> LAMB1,<sup>27</sup> and  
10  
11 193 LAMC1,<sup>28</sup> LAMC2 is encoding by Laminin  $\gamma$ 2 and has been confirmed as a therapeutic target for  
12  
13  
14 194 cancers. Here we performed a meta-analysis of seven studies to achieve a comprehensive  
15  
16  
17 195 evaluation between higher LAMC2 expression and clinicopathological characteristics in various  
18  
19  
20 196 cancer types. Our results showed that higher LAMC2 expression was significantly associated with  
21  
22 197 LNM, TNM stage, and tumor status. However, there was no significant association between  
23  
24  
25 198 LAMC2 expression and age or gender. Simultaneously, we also found that OS/PFS/DSS was  
26  
27 199 higher in patients with low LAMC2 expression. Publication bias analysis demonstrated that no  
28  
29  
30 200 publication bias was observed among the included studies. These results suggested that LAMC2  
31  
32 201 might be a valuable biomarker for predicting prognosis in cancer patients.  
33  
34

35 202  
36  
37 203 Several kinds of research have shown that LAMC2 promotes cancer cells proliferation, motility,  
38  
39 204 and invasion. However, the specific mechanism remained uncertain. ZNF750 inhibited the  
40  
41  
42 205 migration of esophageal squamous cancer cells by inhibiting the LAMC2 transactivation.<sup>29</sup> In  
43  
44  
45 206 hepatocellular carcinoma (HCC), LAMC2 has been found regulated by miR-548c-3p and inhibited  
46  
47  
48 207 the epithelial-mesenchymal transition in HCC.<sup>30</sup> In pancreatic cancer cells, LAMC2 promoted  
49  
50  
51 208 Akt-Ser473 phosphorylation and increased expression and cell membrane accumulation of NHE1,  
52  
53 209 promoting cells migration and invasion.<sup>31</sup> A study by Wu et al. showed that the  
54  
55  
56 210 LAMP3-LAMC2-TNC signal regulated the efficacy of radiation exposure in laryngeal squamous  
57  
58 211 cell carcinoma.<sup>32</sup> High-throughput sequencing results showed that miR-338-5p/3p target LAMC2  
59  
60

1  
2  
3  
4 212 to suppress invasion in salivary adenoid cystic carcinoma cells.<sup>33</sup> LAMC2 was found to promote  
5  
6 213 tumor progression by EGFR signaling.<sup>34, 35</sup> These findings suggested that LAMC2 might play as  
7  
8  
9 214 an oncogene and predict prognosis in cancer patients.  
10

11  
12 215

13  
14 216 Recent researches have also investigated LAMC2 as a valuable biomarker of cancer  
15  
16  
17 217 diagnosis.<sup>36, 37</sup> Due to a limitation of a small sample size, we explored the expression of LAMC2  
18  
19 218 in various cancer types using the TCGA database. The results showed that LAMC2 was  
20  
21  
22 219 upregulated in tumors and might be used as a biomarker for a variety of tumor types. Moreover,  
23  
24  
25 220 we explore the survival analysis from the TCGA database. The results demonstrated that higher  
26  
27 221 LAMC2 expression was associated with poor OS in 9502 patients. We also explored the  
28  
29  
30 222 prognostic role of LAMC2 in different types of cancer. LAMC2 expression was significantly  
31  
32 223 associated with OS in LUAD, MESO, SKCM, HNSC, and LGG, but not in LUSC. This deserves  
33  
34  
35 224 further investigation.  
36

37  
38 225

39  
40 226 Some potential limitations of our study should be noted. First, only seven articles were included  
41  
42  
43 227 in our meta-analysis, the limited number of studies might influence the reliability of the results. Of  
44  
45  
46 228 the seven included studies, five were from China, and two were from Japan. So, our results may  
47  
48  
49 229 only be applicable to the Asian population. Although we determined data from the TCGA  
50  
51  
52 230 database, future studies from non-Asian populations are needed to confirm our findings. Second,  
53  
54 231 there was no consensus on a cutoff value for higher LAMC2 expression. Third, in some  
55  
56 232 researches, the data for HR and 95% CI value was not provided. Although we tried our best to  
57  
58  
59 233 extract the HR and 95% CI value from the Kaplan-Meier curve, some errors are inevitable. Fourth,  
60

1  
2  
3  
4  
5  
6  
7  
8  
9  
10  
11  
12  
13  
14  
15  
16  
17  
18  
19  
20  
21  
22  
23  
24  
25  
26  
27  
28  
29  
30  
31  
32  
33  
34  
35  
36  
37  
38  
39  
40  
41  
42  
43  
44  
45  
46  
47  
48  
49  
50  
51  
52  
53  
54  
55  
56  
57  
58  
59  
60

234 the numbers of patients and tumor types included in this meta-analysis were still limited. So, our  
235 results may exaggerate the prognostic value of LAMC2.

236

## 237 **CONCLUSIONS**

238 In conclusion, LAMC2 may be a valuable biomarker for cancer diagnosis, and upregulation of  
239 LAMC2 is associated with a poor prognosis in cancer patients. For future clinical application,  
240 more high-quality studies with large sample sizes are needed to confirm the role of LAMC2 in  
241 various cancers and regions.

242

## 243 **Acknowledgments**

244 We sincerely thank Dr. Yang Wu for her supports in this study.

245

## 246 **Contributors**

247 T.F and Z.-S.Y designed the study; F.T and J.X searched the literature and extracted data; Z.-S.Y  
248 and T.F analyzed data; Z.-S.Y prepared the figures; Z.-S.Y, J.X.-L and Z.G. wrote the manuscript.

249 All authors gave the final approval of the paper to be published.

250

## 251 **Funding**

252 This study was supported by the Chongqing Science and Health Joint Project (2021MSXM108).

253

## 254 **Competing interests**

255 The authors declare that they have no conflict of interest.

1  
2  
3  
4 256  
5

6 257 **Patient and Public Involvement**

7  
8  
9 258 No patient involved.  
10

11 259

12  
13  
14 260 **Patient consent for publication**

15  
16  
17 261 Not applicable.  
18

19 262

20  
21  
22 263 **Ethics approval**

23  
24 264 This study does not involve human participants.  
25

26  
27 265

28  
29  
30 266 **Data availability statement**

31  
32 267 All data relevant to the study are included in the article.  
33

34  
35 268

36  
37 269 **Abbreviations**

38  
39 270 CI, confidence interval; COAD, colon adenocarcinoma; DLBS, lymphoid neoplasm diffuse large

40  
41 271 B-cell lymphoma; DSS, disease-specific survival; ESCA, esophageal carcinoma; GEPIA, gene

42  
43 272 expression profiling interactive analysis; HCC, hepatocellular carcinoma; HNSC, head and neck

44  
45 273 squamous cell carcinoma; HR, hazard ratio; IHC, immunocytochemistry; LAMC2, laminin

46  
47 274 subunit gamma 2; LGG, brain lower grade glioma; LUAD, lung adenocarcinoma; LUSC, lung

48  
49 275 squamous cell carcinoma; MESO, mesothelioma; NOS, Newcastle-Ottawa Quality Assessment

50  
51 276 Scale; OR, odds ratio; OS, overall survival; PFS, progression-free survival; qRT-PCR,

52  
53 277 quantitative real-time polymerase chain reaction; RNA-seq, RNA sequencing; SKCM, skin  
54  
55  
56  
57  
58  
59  
60



1  
2  
3  
4 278 cutaneous melanoma; TCGA, The Cancer Genome Atlas; TNM, tumor-node-metastasis.  
5  
6

7 279  
8

9 280 **ORCID iD**

10  
11 281 Zhen-Shan Yang <https://orcid.org/0000-0001-6987-9947>  
12  
13

14 282  
15

16  
17 283 **REFERENCES**

18  
19 284 1 Aumailley M. The laminin family. *Cell Adh Migr.* 2013;7(1):48-55.  
20  
21

22 285 2 Hohenester E. Structural biology of laminins. *Essays Biochem.* 2019;63(3):285-295.  
23  
24

25 286 3 Yao Y. Laminin: loss-of-function studies. *Cell Mol Life Sci.* 2017;74(6):1095-1115.  
26  
27

28 287 4 Yap L, Tay HG, Nguyen M, *et al.* Laminins in Cellular Differentiation. *Trends Cell Biol.*  
29

30 288 2019;29(12):987-1000.  
31

32 289 5 Durbeej M. Laminins. *Cell Tissue Res.* 2010;339(1):259-68.  
33  
34

35 290 6 Huang D, Du C, Ji D, *et al.* Overexpression of LAMC2 predicts poor prognosis in colorectal  
36

37 291 cancer patients and promotes cancer cell proliferation, migration, and invasion. *Tumour Biol.*  
38

39 292 2017;39(6):1010428317705849.  
40  
41

42 293 7 Okada Y, Takahashi N, Takayama T, *et al.* LAMC2 promotes cancer progression and  
43

44 294 gemcitabine resistance through modulation of EMT and ATP-binding cassette transporters in  
45

46 295 pancreatic ductal adenocarcinoma. *Carcinogenesis.* 2021;42(4):546-556.  
47  
48

49 296 8 Yang C, Liu Z, Zeng X *et al.* Evaluation of the diagnostic ability of laminin gene family for  
50

51 297 pancreatic ductal adenocarcinoma. *Aging (Albany NY).* 2019;11(11):3679-3703.  
52  
53

54 298 9 Islam S, Kitagawa T, Baron B *et al.* ITGA2, LAMB3, and LAMC2 may be the potential  
55

56 299 therapeutic targets in pancreatic ductal adenocarcinoma: an integrated bioinformatics analysis.  
57  
58  
59  
60

- 1  
2  
3  
4 300 *Sci Rep.* 2021;11(1):10563.  
5  
6  
7 301 10 Jin G, Ruan Q, Shangguan F, *et al.* RUNX2 and LAMC2: promising pancreatic cancer  
8  
9 302 biomarkers identified by an integrative data mining of pancreatic adenocarcinoma tissues.  
10  
11 303 *Aging (Albany NY).* 2021;13(19):22963-22984.  
12  
13  
14 304 11 Liu M, Cai R, Wang T *et al.* LAMC2 promotes the proliferation of cancer cells and induce  
15  
16 305 infiltration of macrophages in non-small cell lung cancer. *Ann Transl Med.* 2021;9(17):1392.  
17  
18  
19 306 12 Zhou QH, Deng CZ, Chen JP *et al.* Elevated serum LAMC2 is associated with lymph node  
20  
21 307 metastasis and predicts poor prognosis in penile squamous cell carcinoma. *Cancer Manag Res.*  
22  
23 308 2018;10:2983-2995.  
24  
25  
26  
27 309 13 Diao B, Yang P. Comprehensive Analysis of the Expression and Prognosis for Laminin Genes  
28  
29 310 in Ovarian Cancer. *Pathol Oncol Res.* 2021;27:1609855.  
30  
31  
32 311 14 Thangaraj SV, Shyamsundar V, Krishnamurthy A, *et al.* Deregulation of extracellular matrix  
33  
34 312 modeling with molecular prognostic markers revealed by transcriptome sequencing and  
35  
36 313 validations in Oral Tongue squamous cell carcinoma. *Sci Rep.* 2021;11(1):250.  
37  
38  
39  
40 314 15 Pei YF, Liu J, Cheng J, *et al.* Silencing of LAMC2 Reverses Epithelial-Mesenchymal  
41  
42 315 Transition and Inhibits Angiogenesis in Cholangiocarcinoma via Inactivation of the Epidermal  
43  
44 316 Growth Factor Receptor Signaling Pathway. *Am J Pathol.* 2019;189(8):1637-1653.  
45  
46  
47  
48 317 16 Liang Y, Chen X, Wu Y *et al.* LncRNA CASC9 promotes esophageal squamous cell  
49  
50 318 carcinoma metastasis through upregulating LAMC2 expression by interacting with the  
51  
52 319 CREB-binding protein. *Cell Death Differ.* 2018;25(11):1980-1995.  
53  
54  
55  
56 320 17 Page MJ, McKenzie JE, Bossuyt PM, *et al.* The PRISMA 2020 statement: an updated guideline  
57  
58 321 for reporting systematic reviews. *BMJ.* 2021;372:n71.  
59  
60

1  
2  
3  
4  
5  
6  
7  
8  
9  
10  
11  
12  
13  
14  
15  
16  
17  
18  
19  
20  
21  
22  
23  
24  
25  
26  
27  
28  
29  
30  
31  
32  
33  
34  
35  
36  
37  
38  
39  
40  
41  
42  
43  
44  
45  
46  
47  
48  
49  
50  
51  
52  
53  
54  
55  
56  
57  
58  
59  
60

- 322 18 Stang A. Critical evaluation of the Newcastle-Ottawa scale for the assessment of the quality of  
323 nonrandomized studies in meta-analyses. *Eur J Epidemiol.* 2010;25(9):603-5.
- 324 19 Tierney JF, Stewart LA, Ghersi D, *et al.* Practical methods for incorporating summary  
325 time-to-event data into meta-analysis. *Trials.* 2007;8:16.
- 326 20 Tang Z, Li C, Kang B *et al.* GEPIA: a web server for cancer and normal gene expression  
327 profiling and interactive analyses. *Nucleic Acids Res.* 2017;45(W1):W98-W102.
- 328 21 Okada Y, Nishiwada S, Yamamura K *et al.* Identification of laminin  $\gamma 2$  as a prognostic and  
329 predictive biomarker for determining response to gemcitabine-based therapy in pancreatic  
330 ductal adenocarcinoma. *Eur J Cancer.* 2021;146:125-134.
- 331 22 Zhan S, Wang T, Wang M, *et al.* In-Depth Proteomics Analysis to Identify Biomarkers of  
332 Papillary Thyroid Cancer Patients Older Than 45 Years with Different Degrees of Lymph  
333 Node Metastases. *Proteomics Clin Appl.* 2019;13(5):e1900030.
- 334 23 Zhou QH, Deng CZ, Chen JP *et al.* Elevated serum LAMC2 is associated with lymph node  
335 metastasis and predicts poor prognosis in penile squamous cell carcinoma. *Cancer Manag Res.*  
336 2018;10:2983-2995.
- 337 24 Garg M, Braunstein G, Koeffler HP. LAMC2 as a therapeutic target for cancers. *Expert Opin*  
338 *Ther Targets.* 2014;18(9):979-82.
- 339 25 Givant-Horwitz V, Davidson B, Reich R. Laminin-induced signaling in tumor cells. *Cancer*  
340 *Lett.* 2005;223(1):1-10.
- 341 26 Diao B, Yang P. Comprehensive Analysis of the Expression and Prognosis for Laminin Genes  
342 in Ovarian Cancer. *Pathol Oncol Res.* 2021;27:1609855.
- 343 27 Ran T, Chen Z, Zhao L *et al.* LAMB1 Is Related to the T Stage and Indicates Poor Prognosis in

- 1  
2  
3  
4 344 Gastric Cancer. *Technol Cancer Res Treat*. 2021;20:15330338211004944.  
5  
6  
7 345 28 Kashima H, Wu RC, Wang Y *et al*. Laminin C1 expression by uterine carcinoma cells is  
8  
9 346 associated with tumor progression. *Gynecol Oncol*. 2015;139(2):338-44.  
10  
11  
12 347 29 Hazawa M, Lin DC, Handral H *et al*. ZNF750 is a lineage-specific tumour suppressor in  
13  
14 348 squamous cell carcinoma. *Oncogene*. 2017;36(16):2243-2254.  
15  
16  
17 349 30 Jin J, Liu H, Jin M *et al*. Silencing of hsa\_circ\_0101145 reverses the epithelial-mesenchymal  
18  
19 350 transition in hepatocellular carcinoma via regulation of the miR-548c-3p/LAMC2 axis. *Aging*  
20  
21  
22 351 (*Albany NY*). 2020;12(12):11623-11635.  
23  
24  
25 352 31 Wang H, Cai J, Du S, *et al*. LAMC2 modulates the acidity of microenvironments to promote  
26  
27 353 invasion and migration of pancreatic cancer cells via regulating AKT-dependent NHE1  
28  
29 354 activity. *Exp Cell Res*. 2020;391(1):111984.  
30  
31  
32 355 32 Wu H, Li J, Chen J *et al*. Efficacy of radiation exposure in laryngeal squamous cell carcinoma  
33  
34 356 is mediated by the LAMP3/LAMC2/tenascin-C pathway. *Exp Biol Med (Maywood)*.  
35  
36 357 2019;244(13):1070-1080.  
37  
38  
39 358 33 Wang S, Zhang L, Shi P *et al*. Genome-wide profiles of metastasis-associated mRNAs and  
40  
41 359 microRNAs in salivary adenoid cystic carcinoma. *Biochem Biophys Res Commun*.  
42  
43 360 2018;500(3):632-638.  
44  
45  
46  
47 361 34 Garg M, Kanojia D, Okamoto R *et al*. Laminin-5  $\gamma$  -2 (LAMC2) is highly expressed in  
48  
49 362 anaplastic thyroid carcinoma and is associated with tumor progression, migration, and invasion  
50  
51 363 by modulating signaling of EGFR. *J Clin Endocrinol Metab*. 2014;99(1):E62-72.  
52  
53  
54  
55 364 35 Daisuke H, Kato H, Fukumura K *et al*. Novel LAMC2 fusion protein has tumor-promoting  
56  
57 365 properties in ovarian carcinoma. *Cancer Sci*. 2021;112(12):4957-4967.  
58  
59  
60

1  
2  
3  
4 366 36 Shokati EZ, Khayer N, Talebi A, *et al.* Novel insight into pancreatic adenocarcinoma  
5  
6 367 pathogenesis using liquid association analysis. *Bmc Med Genomics*. 2022;15(1):30.

7  
8  
9 368 37 You GR, Cheng AJ, Lee LY *et al.* Prognostic signature associated with radioresistance in head  
10  
11 369 and neck cancer via transcriptomic and bioinformatic analyses. *Bmc Cancer*. 2019;19(1):64.

12  
13  
14 370

## 15 16 17 371 **Figure legends**

18  
19 372 **Figure 1 Flow diagram of the literature search and selection**

20  
21  
22 373

23  
24 374 **Figure 2 Forest plots of studies evaluating the relationship between LAMC2 expression and**  
25  
26  
27 375 **clinicopathological features**

28  
29 376 (A) LNM, (B) TNM stage, (C) tumor status, (D) gender, (E) age.

30  
31  
32 377

33  
34 378 **Figure 3 The relationship between LAMC2 expression and OS/PFS/DSS**

35  
36  
37 379 (A) Forest plot for the meta-analysis of OS/PFS/DSS. (B) Sensitivity analysis for LAMC2  
38  
39 380 expression with OS/PFS/DSS. (C) Funnel plot for the meta-analysis of OS/PFS/DSS. (D) Egger's  
40  
41 381 graph for analyzing publication bias.

42  
43  
44 382

45  
46 383 **Figure 4 The expression of LAMC2 in the TCGA database**

47  
48 384 (A) LAMC2 expression in COAD, DLBC, ESCA, HNSC, LUAD, and LUSC. \* =  $p$  value < 0.01.

49  
50 385 (B) OS rate of LAMC2 expression in TCGA database (n = 9502). Gray boxes indicate normal,  
51  
52  
53 386 and red boxes indicate tumor. T, tumor; N, normal.

54  
55  
56 387

57  
58  
59 388

60

1  
2  
3  
4 388 **Figure 5 Kaplan-Meier curves showing the prognostic value of LAMC2 in the TCGA**  
5  
6 389 **database**  
7  
8  
9 390 **(A) LUAD, (B) LUSC, (C) MESO, (D) SKCM, (E) HNSC, (F) LGG.** *p* values were calculated  
10  
11 391 using the log-rank test.  
12  
13  
14  
15  
16  
17  
18  
19  
20  
21  
22  
23  
24  
25  
26  
27  
28  
29  
30  
31  
32  
33  
34  
35  
36  
37  
38  
39  
40  
41  
42  
43  
44  
45  
46  
47  
48  
49  
50  
51  
52  
53  
54  
55  
56  
57  
58  
59  
60

For peer review only

1  
2  
3  
4  
5  
6  
7  
8  
9  
10  
11  
12  
13  
14  
15  
16  
17  
18  
19  
20  
21  
22  
23  
24  
25  
26  
27  
28  
29  
30  
31  
32  
33  
34  
35  
36  
37  
38  
39  
40  
41  
42  
43  
44  
45  
46  
47  
48  
49  
50  
51  
52  
53  
54  
55  
56  
57  
58  
59  
60

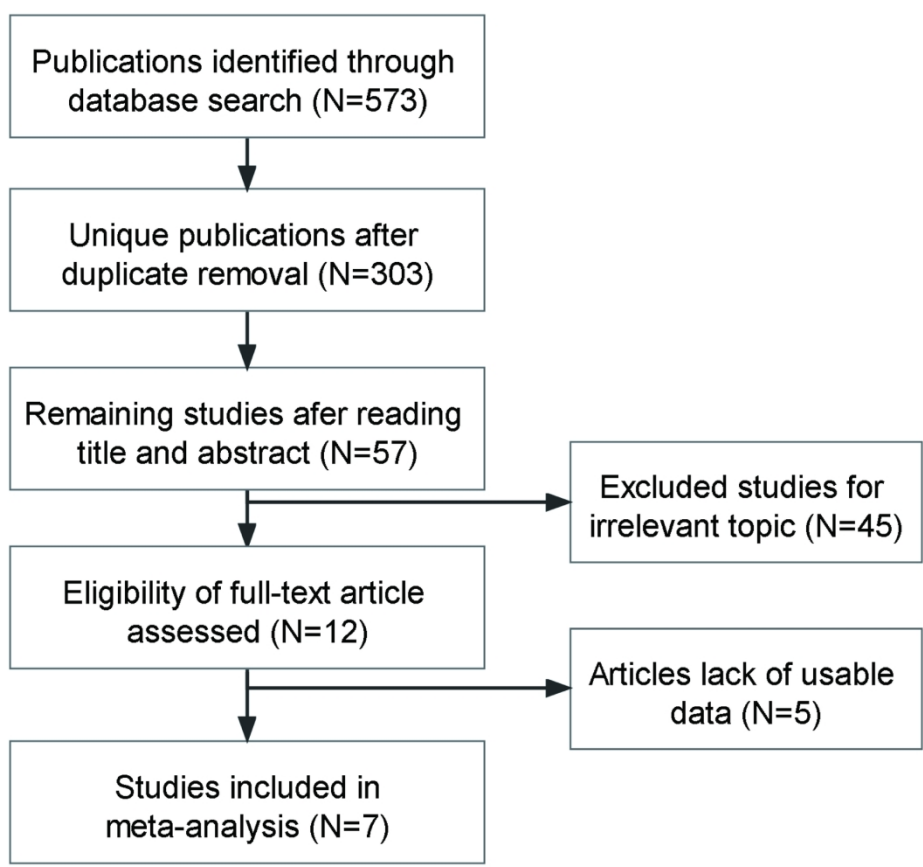

Figure1

170x158mm (300 x 300 DPI)

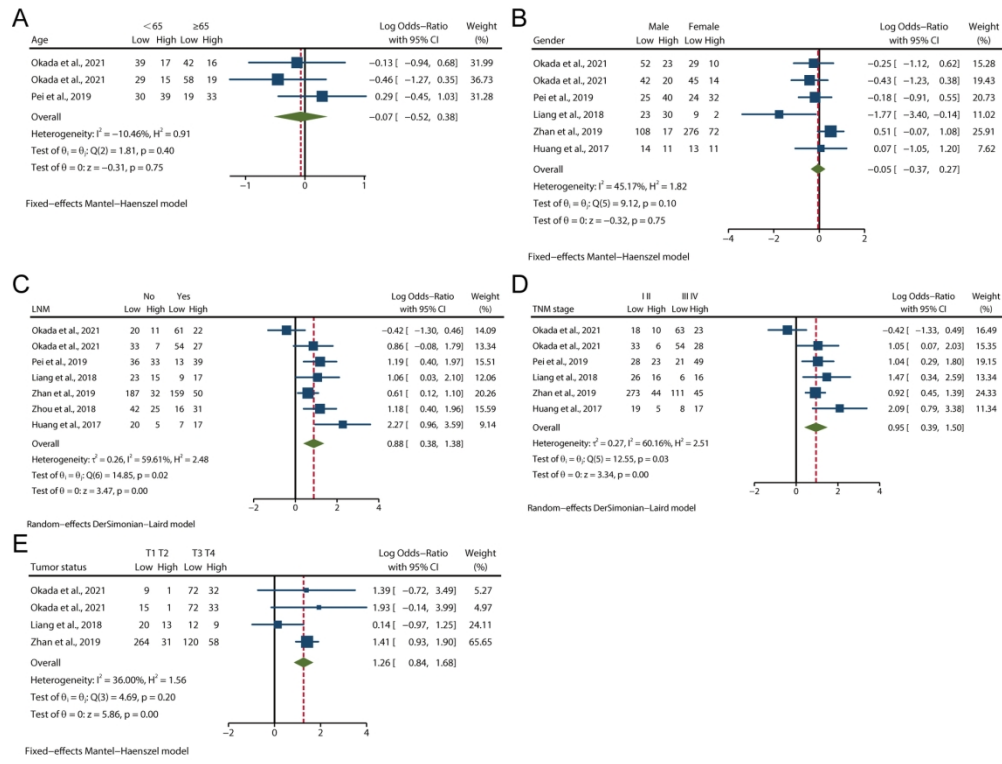

Figure2

168x126mm (300 x 300 DPI)



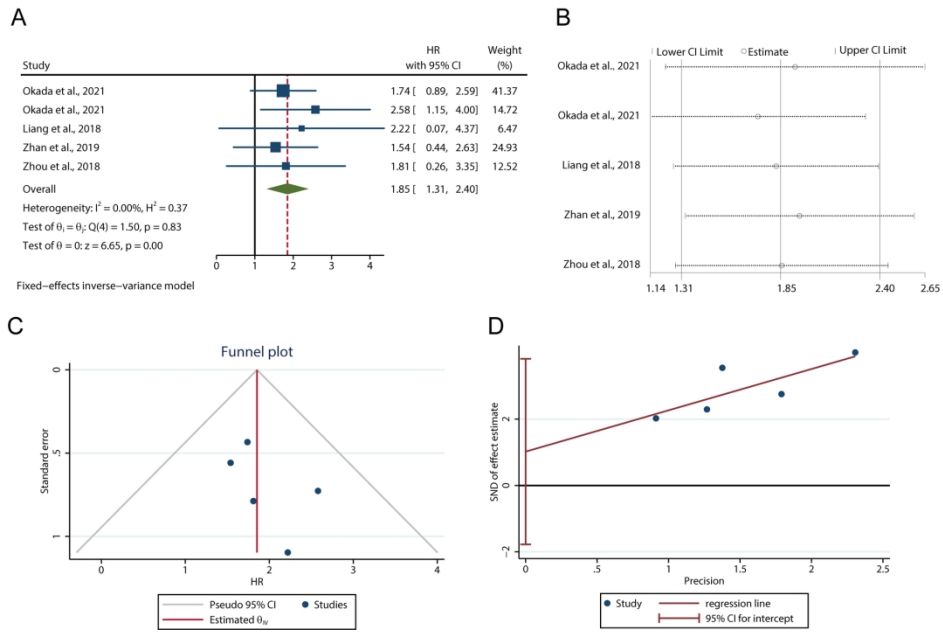

Figure 3

177x110mm (300 x 300 DPI)

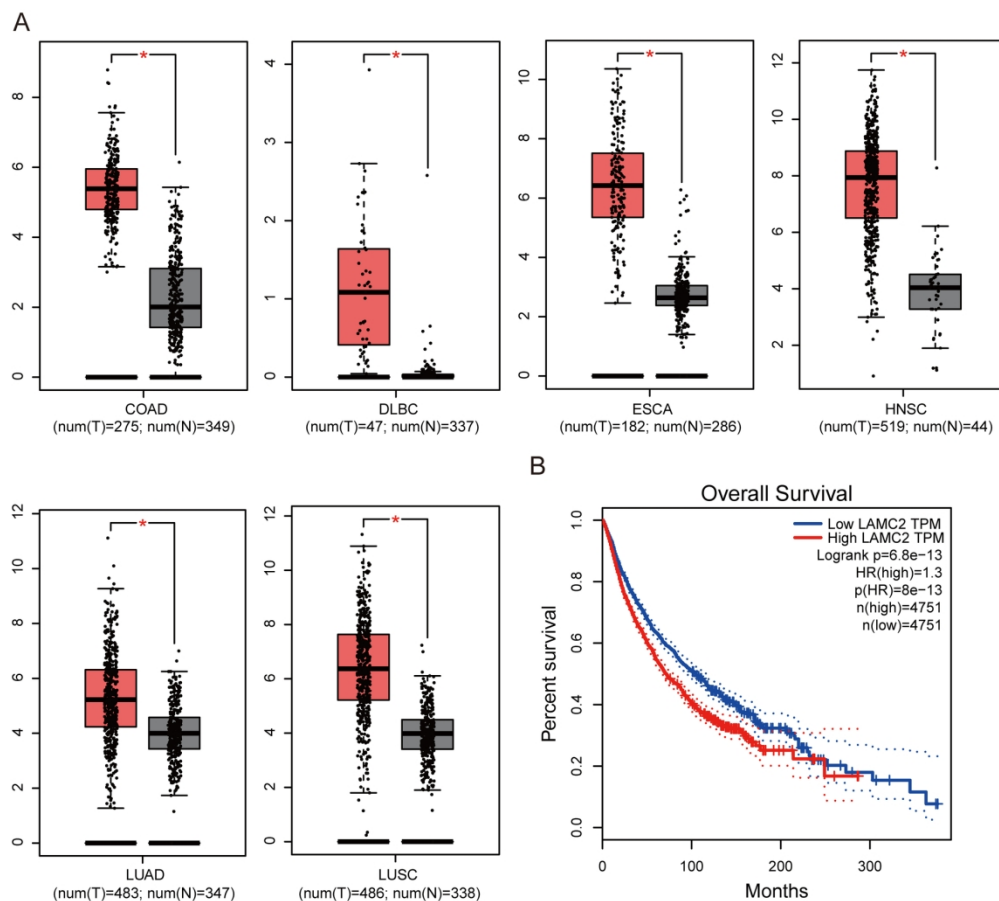

Figure4

166x148mm (300 x 300 DPI)

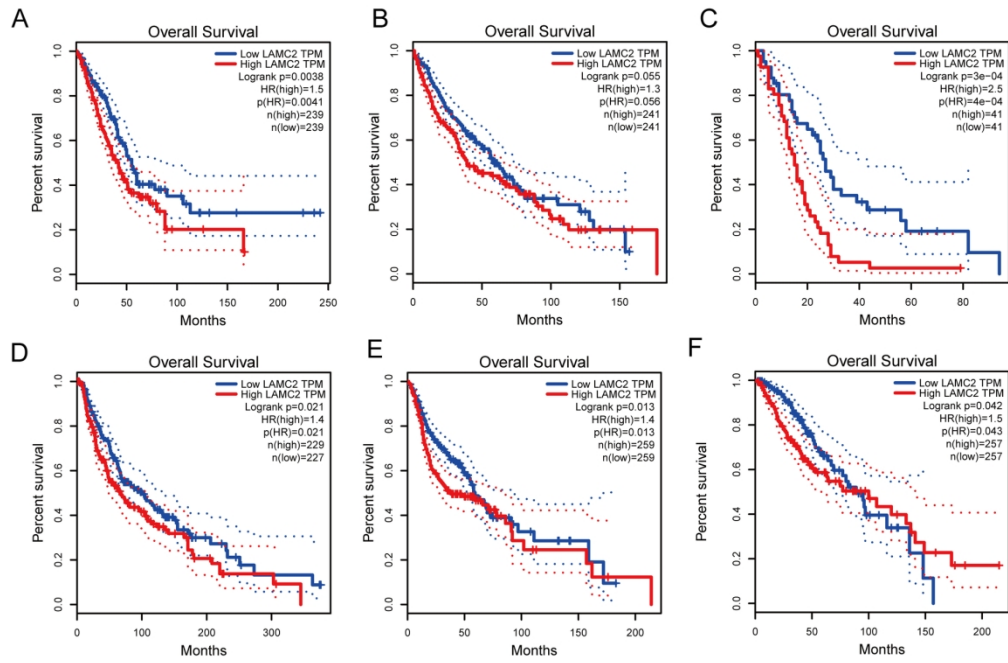

Figure5

162x106mm (300 x 300 DPI)

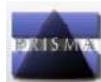

## PRISMA 2020 Checklist

1  
2  
3  
4  
5  
6  
7  
8  
9  
10  
11  
12  
13  
14  
15  
16  
17  
18  
19  
20  
21  
22  
23  
24  
25  
26  
27  
28  
29  
30  
31  
32  
33  
34  
35  
36  
37  
38  
39  
40  
41  
42  
43  
44  
45  
46  
47

| Section and Topic             | Item # | Checklist item                                                                                                                                                                                                                                                                                       | Location where item is reported |
|-------------------------------|--------|------------------------------------------------------------------------------------------------------------------------------------------------------------------------------------------------------------------------------------------------------------------------------------------------------|---------------------------------|
| <b>TITLE</b>                  |        |                                                                                                                                                                                                                                                                                                      |                                 |
| Title                         | 1      | Identify the report as a systematic review.                                                                                                                                                                                                                                                          | Page 1                          |
| <b>ABSTRACT</b>               |        |                                                                                                                                                                                                                                                                                                      |                                 |
| Abstract                      | 2      | See the PRISMA 2020 for Abstracts checklist.                                                                                                                                                                                                                                                         | Page 1                          |
| <b>INTRODUCTION</b>           |        |                                                                                                                                                                                                                                                                                                      |                                 |
| Rationale                     | 3      | Describe the rationale for the review in the context of existing knowledge.                                                                                                                                                                                                                          | Page 3                          |
| Objectives                    | 4      | Provide an explicit statement of the objective(s) or question(s) the review addresses.                                                                                                                                                                                                               | Page 3                          |
| <b>METHODS</b>                |        |                                                                                                                                                                                                                                                                                                      |                                 |
| Eligibility criteria          | 5      | Specify the inclusion and exclusion criteria for the review and how studies were grouped for the syntheses.                                                                                                                                                                                          | Page 4                          |
| Information sources           | 6      | Specify all databases, registers, websites, organisations, reference lists and other sources searched or consulted to identify studies. Specify the date when each source was last searched or consulted.                                                                                            | Page 4                          |
| Search strategy               | 7      | Present the full search strategies for all databases, registers and websites, including any filters and limits used.                                                                                                                                                                                 | Page 4                          |
| Selection process             | 8      | Specify the methods used to decide whether a study met the inclusion criteria of the review, including how many reviewers screened each record and each report retrieved, whether they worked independently, and if applicable, details of automation tools used in the process.                     | Page 5                          |
| Data collection process       | 9      | Specify the methods used to collect data from reports, including how many reviewers collected data from each report, whether they worked independently, any processes for obtaining or confirming data from study investigators, and if applicable, details of automation tools used in the process. | Page 5                          |
| Data items                    | 10a    | List and define all outcomes for which data were sought. Specify whether all results that were compatible with each outcome domain in each study were sought (e.g. for all measures, time points, analyses), and if not, the methods used to decide which results to collect.                        | Page 5                          |
|                               | 10b    | List and define all other variables for which data were sought (e.g. participant and intervention characteristics, funding sources). Describe any assumptions made about any missing or unclear information.                                                                                         | Page 5                          |
| Study risk of bias assessment | 11     | Specify the methods used to assess risk of bias in the included studies, including details of the tool(s) used, how many reviewers assessed each study and whether they worked independently, and if applicable, details of automation tools used in the process.                                    | Page 6                          |
| Effect measures               | 12     | Specify for each outcome the effect measure(s) (e.g. risk ratio, mean difference) used in the synthesis or presentation of results.                                                                                                                                                                  | Page 6                          |
| Synthesis methods             | 13a    | Describe the processes used to decide which studies were eligible for each synthesis (e.g. tabulating the study intervention characteristics and comparing against the planned groups for each synthesis (item #5)).                                                                                 | Page 4                          |
|                               | 13b    | Describe any methods required to prepare the data for presentation or synthesis, such as handling of missing summary statistics, or data conversions.                                                                                                                                                | Page 5                          |
|                               | 13c    | Describe any methods used to tabulate or visually display results of individual studies and syntheses.                                                                                                                                                                                               | Page 5                          |
|                               | 13d    | Describe any methods used to synthesize results and provide a rationale for the choice(s). If meta-analysis was performed, describe the model(s), method(s) to identify the presence and extent of statistical heterogeneity, and software package(s) used.                                          | Page 6                          |
|                               | 13e    | Describe any methods used to explore possible causes of heterogeneity among study results (e.g. subgroup analysis, meta-regression).                                                                                                                                                                 | -                               |
|                               | 13f    | Describe any sensitivity analyses conducted to assess robustness of the synthesized results.                                                                                                                                                                                                         | Page 6                          |
| Reporting bias assessment     | 14     | Describe any methods used to assess risk of bias due to missing results in a synthesis (arising from reporting biases).                                                                                                                                                                              | Page 6                          |
| Certainty assessment          | 15     | Describe any methods used to assess certainty (or confidence) in the body of evidence for an outcome.<br>For peer review only - <a href="http://bmjopen.bmj.com/site/about/guidelines.xhtml">http://bmjopen.bmj.com/site/about/guidelines.xhtml</a>                                                  | Page 6                          |

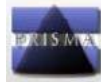

## PRISMA 2020 Checklist

1  
2  
3  
4  
5  
6  
7  
8  
9  
10  
11  
12  
13  
14  
15  
16  
17  
18  
19  
20  
21  
22  
23  
24  
25  
26  
27  
28  
29  
30  
31  
32  
33  
34  
35  
36  
37  
38  
39  
40  
41  
42  
43  
44  
45  
46  
47

| Section and Topic                              | Item # | Checklist item                                                                                                                                                                                                                                                                       | Location where item is reported |
|------------------------------------------------|--------|--------------------------------------------------------------------------------------------------------------------------------------------------------------------------------------------------------------------------------------------------------------------------------------|---------------------------------|
| <b>RESULTS</b>                                 |        |                                                                                                                                                                                                                                                                                      |                                 |
| Study selection                                | 16a    | Describe the results of the search and selection process, from the number of records identified in the search to the number of studies included in the review, ideally using a flow diagram.                                                                                         | Page 6                          |
|                                                | 16b    | Cite studies that might appear to meet the inclusion criteria, but which were excluded, and explain why they were excluded.                                                                                                                                                          | Page 6                          |
| Study characteristics                          | 17     | Cite each included study and present its characteristics.                                                                                                                                                                                                                            | Page 6                          |
| Risk of bias in studies                        | 18     | Present assessments of risk of bias for each included study.                                                                                                                                                                                                                         | Page 8                          |
| Results of individual studies                  | 19     | For all outcomes, present, for each study: (a) summary statistics for each group (where appropriate) and (b) an effect estimate and its precision (e.g. confidence/credible interval), ideally using structured tables or plots.                                                     | Page 7                          |
| Results of syntheses                           | 20a    | For each synthesis, briefly summarise the characteristics and risk of bias among contributing studies.                                                                                                                                                                               | Page 8                          |
|                                                | 20b    | Present results of all statistical syntheses conducted. If meta-analysis was done, present for each the summary estimate and its precision (e.g. confidence/credible interval) and measures of statistical heterogeneity. If comparing groups, describe the direction of the effect. | Page 7                          |
|                                                | 20c    | Present results of all investigations of possible causes of heterogeneity among study results.                                                                                                                                                                                       | Page 7                          |
|                                                | 20d    | Present results of all sensitivity analyses conducted to assess the robustness of the synthesized results.                                                                                                                                                                           | Page 8                          |
| Reporting biases                               | 21     | Present assessments of risk of bias due to missing results (arising from reporting biases) for each synthesis assessed.                                                                                                                                                              | Page 8                          |
| Certainty of evidence                          | 22     | Present assessments of certainty (or confidence) in the body of evidence for each outcome assessed.                                                                                                                                                                                  | Page 8                          |
| <b>DISCUSSION</b>                              |        |                                                                                                                                                                                                                                                                                      |                                 |
| Discussion                                     | 23a    | Provide a general interpretation of the results in the context of other evidence.                                                                                                                                                                                                    | Page 9                          |
|                                                | 23b    | Discuss any limitations of the evidence included in the review.                                                                                                                                                                                                                      | Page 11                         |
|                                                | 23c    | Discuss any limitations of the review processes used.                                                                                                                                                                                                                                | Page 11                         |
|                                                | 23d    | Discuss implications of the results for practice, policy, and future research.                                                                                                                                                                                                       | Page 12                         |
| <b>OTHER INFORMATION</b>                       |        |                                                                                                                                                                                                                                                                                      |                                 |
| Registration and protocol                      | 24a    | Provide registration information for the review, including register name and registration number, or state that the review was not registered.                                                                                                                                       | Page 4                          |
|                                                | 24b    | Indicate where the review protocol can be accessed, or state that a protocol was not prepared.                                                                                                                                                                                       | Page 4                          |
|                                                | 24c    | Describe and explain any amendments to information provided at registration or in the protocol.                                                                                                                                                                                      | Page 4                          |
| Support                                        | 25     | Describe sources of financial or non-financial support for the review, and the role of the funders or sponsors in the review.                                                                                                                                                        | Page 12                         |
| Competing interests                            | 26     | Declare any competing interests of review authors.                                                                                                                                                                                                                                   | Page 12                         |
| Availability of data, code and other materials | 27     | Report which of the following are publicly available and where they can be found: template data collection forms; data extracted from included studies; data used for all analyses; analytic code; any other materials used in the review.                                           | Page 13                         |

# BMJ Open

## LAMC2 as a prognostic biomarker in human cancer: a systematic review and meta-analysis

|                                 |                                                                                                                                                                                                                                                                                                                                                                                                                                                                                                                                                                                                                                                                                                                                                                                                                                                                                                                                                                                                       |
|---------------------------------|-------------------------------------------------------------------------------------------------------------------------------------------------------------------------------------------------------------------------------------------------------------------------------------------------------------------------------------------------------------------------------------------------------------------------------------------------------------------------------------------------------------------------------------------------------------------------------------------------------------------------------------------------------------------------------------------------------------------------------------------------------------------------------------------------------------------------------------------------------------------------------------------------------------------------------------------------------------------------------------------------------|
| Journal:                        | <i>BMJ Open</i>                                                                                                                                                                                                                                                                                                                                                                                                                                                                                                                                                                                                                                                                                                                                                                                                                                                                                                                                                                                       |
| Manuscript ID                   | bmjopen-2022-063682.R1                                                                                                                                                                                                                                                                                                                                                                                                                                                                                                                                                                                                                                                                                                                                                                                                                                                                                                                                                                                |
| Article Type:                   | Original research                                                                                                                                                                                                                                                                                                                                                                                                                                                                                                                                                                                                                                                                                                                                                                                                                                                                                                                                                                                     |
| Date Submitted by the Author:   | 30-Sep-2022                                                                                                                                                                                                                                                                                                                                                                                                                                                                                                                                                                                                                                                                                                                                                                                                                                                                                                                                                                                           |
| Complete List of Authors:       | Fu, Tao; Chongqing Key Laboratory of Human Engineering, Center for Reproductive Medicine, Women and Children's Hospital of Chongqing Medical University; Chongqing Clinical Research Center for Reproductive Medicine, Chongqing Health Center for Women and Children<br>Liu, Jun-Xia; Chongqing Key Laboratory of Human Engineering, Center for Reproductive Medicine, Women and Children's Hospital of Chongqing Medical University; Chongqing Clinical Research Center for Reproductive Medicine, Chongqing Health Center for Women and Children<br>Xie, Juan; Chongqing Key Laboratory of Human Engineering, Center for Reproductive Medicine, Women and Children's Hospital of Chongqing Medical University; Chongqing Clinical Research Center for Reproductive Medicine, Chongqing Health Center for Women and Children<br>Gao, Zhen; College of Animal Veterinary Medicine, Northwest A & F University<br>Yang, Zhenshan; College of Veterinary Medicine, South China Agricultural University |
| <b>Primary Subject Heading</b>: | Oncology                                                                                                                                                                                                                                                                                                                                                                                                                                                                                                                                                                                                                                                                                                                                                                                                                                                                                                                                                                                              |
| Secondary Subject Heading:      | Oncology                                                                                                                                                                                                                                                                                                                                                                                                                                                                                                                                                                                                                                                                                                                                                                                                                                                                                                                                                                                              |
| Keywords:                       | ONCOLOGY, Adult oncology < ONCOLOGY, Oncogenes < ONCOLOGY                                                                                                                                                                                                                                                                                                                                                                                                                                                                                                                                                                                                                                                                                                                                                                                                                                                                                                                                             |
|                                 |                                                                                                                                                                                                                                                                                                                                                                                                                                                                                                                                                                                                                                                                                                                                                                                                                                                                                                                                                                                                       |

SCHOLARONE™  
Manuscripts



I, the Submitting Author has the right to grant and does grant on behalf of all authors of the Work (as defined in the below author licence), an exclusive licence and/or a non-exclusive licence for contributions from authors who are: i) UK Crown employees; ii) where BMJ has agreed a CC-BY licence shall apply, and/or iii) in accordance with the terms applicable for US Federal Government officers or employees acting as part of their official duties; on a worldwide, perpetual, irrevocable, royalty-free basis to BMJ Publishing Group Ltd ("BMJ") its licensees and where the relevant Journal is co-owned by BMJ to the co-owners of the Journal, to publish the Work in this journal and any other BMJ products and to exploit all rights, as set out in our [licence](#).

The Submitting Author accepts and understands that any supply made under these terms is made by BMJ to the Submitting Author unless you are acting as an employee on behalf of your employer or a postgraduate student of an affiliated institution which is paying any applicable article publishing charge ("APC") for Open Access articles. Where the Submitting Author wishes to make the Work available on an Open Access basis (and intends to pay the relevant APC), the terms of reuse of such Open Access shall be governed by a Creative Commons licence – details of these licences and which [Creative Commons](#) licence will apply to this Work are set out in our licence referred to above.

Other than as permitted in any relevant BMJ Author's Self Archiving Policies, I confirm this Work has not been accepted for publication elsewhere, is not being considered for publication elsewhere and does not duplicate material already published. I confirm all authors consent to publication of this Work and authorise the granting of this licence.

1  
2  
3  
4 **1 LAMC2 as a prognostic biomarker in human cancer: a systematic review and meta-analysis**  
5  
6

7 2

8  
9 3 Tao Fu,<sup>1,2</sup> Jun-Xia Liu,<sup>1,2</sup> Juan Xie,<sup>1,2</sup> Zhen Gao,<sup>3</sup> Zhen-Shan Yang<sup>4\*</sup>  
10

11 4

12  
13  
14 <sup>1</sup> Chongqing Key Laboratory of Human Engineering, Center for Reproductive Medicine, Women  
15 and Children's Hospital of Chongqing Medical University, Chongqing, China  
16

17  
18 <sup>2</sup> Chongqing Clinical Research Center for Reproductive Medicine, Chongqing Health Center for  
19 Women and Children, Chongqing, China  
20

21  
22 <sup>3</sup> Key Laboratory of Animal Biotechnology, Ministry of Agriculture, College of Animal  
23 Veterinary Medicine, Northwest A & F University, Yangling 712100, China  
24

25  
26 <sup>4</sup> College of Veterinary Medicine, South China Agricultural University, Guangzhou, 510642,  
27 China  
28

29  
30  
31  
32  
33  
34  
35  
36  
37  
38 \* Correspondence

39  
40 Zhen-Shan Yang, Ph.D., College of Veterinary Medicine, South China Agricultural University,  
41 Guangzhou, 510642, China.  
42

43  
44  
45  
46 Email: le1730@126.com  
47

48  
49  
50  
51  
52  
53  
54  
55  
56  
57  
58  
59  
60  
Word count: 4031 words.

20  
21 **ABSTRACT**

22 **Objectives** Accumulating evidence suggested that the laminin  $\gamma$ 2 (LAMC2) expression level was



1  
2  
3  
4 23 upregulated in various cancers. However, the potential prognostic value of LAMC2 in cancers  
5  
6 24 remains unclear. We conducted a meta-analysis to clarify the association of LAMC2 expression  
7  
8  
9 25 with prognosis.

10  
11 26 **Design** We searched Embase, Web of Science, and PubMed (up to 25 November 2021) to collect  
12  
13  
14 27 all eligible studies, and meta-analysis was performed to interpret the association of LAMC2  
15  
16  
17 28 expression with clinicopathological parameters, overall survival (OS), disease-specific survival  
18  
19  
20 29 (DSS), and progression-free survival (PFS).

21  
22 30 **Eligibility criteria for including studies** We included studies that investigate the relationship  
23  
24  
25 31 between LAMC2 and prognosis of cancers, patients were divided into two groups, and  
26  
27  
28 32 associations of LAMC2 expression with clinicopathologic features were described.

29  
30 33 **Results** Seven studies were finally included. We found that increased LAMC2 expression was  
31  
32  
33 34 significantly associated with lymph node metastasis (Log odds ratio [OR]: 0.88, 95% confidence  
34  
35  
36 35 interval [CI]: 0.38-1.38,  $p < 0.001$ ), tumor-node-metastasis stages (Log OR: 0.95, 95% CI:  
36  
37  
38 36 0.39-1.50,  $p < 0.001$ ), and tumor status (Log OR: 1.26, 95% CI: 0.84-1.68,  $p < 0.001$ ), but not with  
39  
40  
41 37 age (Log OR: -0.05, 95% CI: -0.37-0.27,  $p = 0.75$ ) or gender (Log OR: -0.07, 95% CI: -0.52-0.38,  
42  
43  
44 38  $p = 0.75$ ). In addition, higher LAMC2 expression was found to be significantly associated with  
45  
46  
47 39 OS/PFS/DSS (Hazard ratio [HR]: 1.85, 95% CI: 1.31-2.40,  $p < 0.001$ ). A similar result was found  
48  
49  
50 40 in The Cancer Genome Atlas database. High LAMC2 expression was significantly associated with  
51  
52  
53 41 OS in lung adenocarcinoma, mesothelioma, skin cutaneous melanoma, neck squamous cell  
53  
54  
55 42 carcinoma, and brain lower grade glioma.

56 43 **Conclusion** Our results suggested that higher LAMC2 expression was correlated with worse  
57  
58  
59 44 survival, lymph node metastasis, tumor-node-metastasis stages, and tumor status. This study was  
60

1  
2  
3  
4 45 subject to inherent limitations, but the results presented here provide insights regarding the  
5  
6  
7 46 potential use of LAMC2 as a biomarker for human cancer.

8  
9 47 **Study registration** researchregistry.com (researchregistry1319).  
10  
11

12 48

#### 13 14 49 **Strengths and limitations of this study**

15  
16  
17 50 This systematic review and meta-analysis provide comprehensive literature published up to  
18  
19 51 November 2020 was performed in Embase, Web of Science, and PubMed.

20  
21  
22 52 This study adheres to Preferred Reporting Items for Systematic Reviews and Meta-Analyses  
23  
24 53 guidelines.

25  
26  
27 54 Additional data sources, such as grey literature, were not searched.  
28  
29

30 55

#### 31 32 56 **KEY WORDS**

33  
34  
35 57 Cancer, Laminin  $\gamma$ 2 (LAMC2), Meta-analysis, Prognosis  
36  
37

38 58

#### 39 40 59 **INTRODUCTION**

41  
42  
43 60 Laminins are trimeric proteins composed of  $\alpha$ ,  $\beta$ , and  $\gamma$  chains which are the main component of  
44  
45 61 basement membranes.<sup>1</sup> Mammalian genome encodes five  $\alpha$  chains, four  $\beta$  chains, and three  $\gamma$   
46  
47 62 chains.<sup>2</sup> Loss-of-function studies show that most laminin mutants are embryonic lethal.<sup>3</sup> Laminins  
48  
49 63 are involved in various biological processes, including cellular phenotype maintenance, adhesion,  
50  
51 64 migration, growth, and differentiation *in vivo* and *in vitro*.<sup>4,5</sup>  
52  
53  
54  
55

56 65

57  
58  
59 66 In recent years, laminin  $\gamma$ 2 (LAMC2) has attracted increasingly attractive because of the  
60

1  
2  
3  
4 67 aberrant expression of LAMC2 in various cancer. The LAMC2 expression was significantly  
5  
6 68 upregulated in colorectal cancer tissues compared with adjacent normal tissues, and high LAMC2  
7  
8  
9 69 expression is known to be associated with poor patient prognosis.<sup>6</sup> Furthermore, overexpression of  
10  
11 70 LAMC2 has been reported in pancreatic ductal adenocarcinoma,<sup>7-11</sup> non-small cell lung cancer,<sup>12</sup>  
12  
13  
14 71 penile squamous cell carcinoma,<sup>13</sup> ovarian cancer,<sup>14</sup> Oral tongue squamous cell carcinoma,<sup>15</sup>  
15  
16  
17 72 Cholangiocarcinoma,<sup>16</sup> and esophageal squamous cell carcinoma,<sup>17</sup> leading to poor  
18  
19 73 clinicopathological features and short survival time.  
20  
21  
22 74

23  
24  
25 75 However, individual studies may be inadequate and inaccurate due to their small sample and  
26  
27 76 study design. To date, there was no meta-analysis has been performed to investigate the  
28  
29  
30 77 relationship between LAMC2 and the prognostic value. Therefore, we performed a comprehensive  
31  
32 78 meta-analysis to assess the correlation between LAMC2 and survival outcomes and  
33  
34  
35 79 clinicopathological features in human cancers.  
36  
37  
38 80

## 40 81 **METHODS**

41  
42  
43 82 This study followed the Preferred Reporting Items for Systematic Reviews and Meta-Analyses  
44  
45 83 guidelines<sup>18</sup> (online supplemental table S1). and the protocol was published on Research Registry  
46  
47  
48 84 (researchregistry1319).  
49  
50  
51 85

### 53 86 **Patient and Public Involvement**

54  
55  
56 87 No patient was involved.  
57  
58  
59 88  
60

## 89 **Search strategy**

90 A literature search was conducted in Embase, Web of Science, and PubMed (up to 25 November  
91 2021). The keywords were (laminin C2 OR LAMC2 OR laminin subunit gamma 2) AND  
92 (prognosis OR prognostic OR survival). The detailed search strategy is in supplemental file 1. The  
93 reference lists and citation sections of relevant studies were also screened for additional eligible  
94 studies.

## 96 **Study selection**

97 Studies that met the following criteria were included in the meta-analysis: (1) study of the  
98 relationship between LAMC2 and prognosis of cancers, (2) patients were divided into two groups:  
99 high LAMC2 expression and low LAM2 expression group, and (3) associations of LAMC2  
100 expression with overall survival and clinicopathologic features were described. The exclusion  
101 criteria in our meta-analysis were as follows: (1) case reports, letters, reviews, editorials, and  
102 expert opinions, (2) studies published non-English language, (3) non-human studies, and (4)  
103 studies without sufficient available data.

## 105 **Quality assessment**

106 The Newcastle-Ottawa Quality Assessment Scale (NOS) criteria was used to assess the quality of  
107 the eligible studies.<sup>19</sup> The NOS contains nine items that include selection, comparability, and  
108 outcome for studies. When the NOS score was  $\geq 6$ , the study was considered high quality.

## 110 **Data extraction**

1  
2  
3  
4 111 Two authors (T.F. and Z.-S.Y.) performed the data extraction independently. Disagreements were  
5  
6 112 resolved by discussion and consensus with the third author (J.X.). The following information from  
7  
8  
9 113 the included studies was collected: the first author's name, publication year, country, number of  
10  
11 114 cases, cancer type, the detection method of LAMC2, clinicopathological features, and survival  
12  
13  
14 115 outcome. When multivariate and univariate analyses were simultaneously reported, only the  
15  
16  
17 116 former was extracted. If studies only provided Kaplan-Meier curves, the survival data were  
18  
19  
20 117 extracted from the graphical curve and calculated HR and 95% CI were reckoned using the  
21  
22 118 published method.<sup>20</sup>  
23  
24  
25  
26

#### 27 120 **Public data and tools**

28  
29  
30 121 The web-based tool named Gene Expression Profiling Interactive Analysis (GEPIA) was used to  
31  
32 122 analyze associations between LAMC2 and clinical outcomes.<sup>21</sup>  
33  
34  
35  
36  
37

#### 38 124 **Statistical analysis**

39  
40 125 We used Stata MP 16 software (Stata, College Station, TX) to perform statistical analysis. Log  
41  
42 126 odds ratio (OR) and 95% confidence interval (CI) were calculated for the association of LAMC2  
43  
44  
45 127 expression and clinicopathological characteristics. The prognostic role of LAMC2 expression in  
46  
47  
48 128 overall survival (OS), disease-specific survival (DSS), and progression-free survival (PFS) was  
49  
50  
51 129 evaluated through Hazard ratio [HR] with 95% CI. The statistical heterogeneity among the studies  
52  
53 130 was analyzed by using  $I^2$  test and Q test. When significant heterogeneity ( $I^2 \geq 50\%$ ,  $p < 0.05$ )  
54  
55  
56 131 was observed, the random-effects model was chosen. Otherwise, the fixed-effects model was used.  
57  
58  
59 132 The Egger's test and Begg's test were used to assess the potential publication bias. We conducted  
60

133 a sensitivity analysis to explore the stability of the overall meta-analysis results.  $p < 0.05$  was  
 134 considered as statistically significant.

135

## 136 RESULTS

### 137 Study identification and characteristics

138 As is shown in Figure 1, a total of seven studies with 1,056 patients with cancer were included in  
 139 this meta-analysis satisfied the inclusion criteria.<sup>6, 7, 16, 17, 22-24</sup> The publication period ranged from  
 140 2017-2021. All of our included studies had high quality with Newcastle-Ottawa Quality  
 141 Assessment Scale scores  $\geq 6$ . The included studies addressed six different cancer types:  
 142 esophageal squamous cell carcinoma (n = 1), pancreatic ductal adenocarcinoma (n = 2),  
 143 cholangiocarcinoma (n = 1), papillary thyroid cancer (n = 1), colorectal cancer (n = 1), and penile  
 144 squamous cell carcinoma (n = 1). The main characteristics of the seven studies are summarized in  
 145 Table 1.

147 **Table 1 Characteristics of studies included in this meta-analysis**

| Study        | Year | Region | Sample | Cancer                             | Method  | Outcome | NOS score |
|--------------|------|--------|--------|------------------------------------|---------|---------|-----------|
| Okada et al. | 2021 | Japan  | 114    | pancreatic ductal adenocarcinoma   | qRT-PCR | OS      | 8         |
| Okada et al. | 2021 | Japan  | 121    | pancreatic ductal adenocarcinoma   | qRT-PCR | OS      | 8         |
| Pei et al.   | 2019 | China  | 121    | cholangiocarcinoma                 | IHC     | -       | 7         |
| Liang et al. | 2018 | China  | 64     | esophageal squamous cell carcinoma | qRT-PCR | OS      | 7         |
| Zhan et al.  | 2019 | China  | 473    | papillary Thyroid Cancer           | RNA-seq | PFS     | 6         |

|   |              |      |       |     |                                |     |     |   |
|---|--------------|------|-------|-----|--------------------------------|-----|-----|---|
| 1 |              |      |       |     |                                |     |     |   |
| 2 |              |      |       |     |                                |     |     |   |
| 3 |              |      |       |     |                                |     |     |   |
| 4 | Zhou et al.  | 2018 | China | 114 | penile squamous cell carcinoma | IHC | DSS | 7 |
| 5 |              |      |       |     |                                |     |     |   |
| 6 | Huang et al. | 2017 | China | 49  | colorectal cancer              | IHC | -   | 6 |
| 7 |              |      |       |     |                                |     |     |   |

148 Abbreviations: DSS, disease-specific survival; IHC, immunocytochemistry; NOS,  
 149 Newcastle-Ottawa scale; OS, overall survival; PFS, progression-free survival; qRT-PCR,  
 150 quantitative real-time polymerase chain reaction.

151

### 152 Relationship between LAMC2 expression and clinicopathological parameters

153 We evaluated the relationship between LAMC2 expression and clinicopathological parameters  
 154 in various cancers. As shown in Figures 2A and B, there were three and six studies describing  
 155 patients of age and gender, respectively. The pooled analysis demonstrated that there was no  
 156 significant association between LAMC2 expression and age or gender. High expression of  
 157 LAMC2 was significantly associated with lymph node metastasis (LNM) (Log OR: 0.88, 95% CI:  
 158 0.38-1.38,  $p < 0.001$ , Figure 2C) and tumor-node-metastasis (TNM) stage (Log OR: 0.95, 95% CI:  
 159 0.39-1.50,  $p < 0.001$ , Figure 2D). There was significant heterogeneity among these studies ( $I^2 =$   
 160 59.61%,  $P = 0.02$ ;  $I^2 = 60.16%$ ,  $p = 0.03$ ), and thus the random-effects DerSimonian-Laird model  
 161 was adopted. A total of four studies evaluated tumor status according to LAMC2 expression. No  
 162 statistically significant heterogeneity was found among the studies ( $I^2 = 36.00%$ ,  $p = 0.20$ ); thus,  
 163 the fixed-effect Mantel-Haenszel model was adopted. As shown in Figure 2E, high expression of  
 164 LAMC2 was significantly associated with tumor status (Log OR: 1.26, 95% CI: 0.84-1.68,  $p <$   
 165 0.001). This finding suggests that high LAMC2 expression is associated with clinicopathological  
 166 features.

167

## 168 **Relationship between LAMC2 expression and OS/PFS/DSS**

169 There were five studies including 872 patients presenting the relationship between LAMC2 and  
170 OS/PFS/DSS. Due to no significant heterogeneity being found among studies ( $I^2 = 0.00\%$ ,  $p =$   
171  $0.83$ ), the fixed-effect inverse-variance model was adopted to estimate the pooled HR and 95% CI.  
172 The pooled HR indicated that the expression of LAMC2 was negatively associated with  
173 OS/PFS/DSS (HR: 1.85, 95% CI: 1.31-2.40,  $p < 0.001$ , Figure 3A), which demonstrated that  
174 LAMC2 was a risk factor for the prognosis of cancer patients. In addition, sensitivity analysis was  
175 performed to determine the effect of individual studies on the OS/PFS/DSS. It revealed that no  
176 single study altered the pooled LAMC2 HR result significantly (Figure 3B). This suggested that  
177 the result of the meta-analysis was stable.

## 179 **Analysis of publication bias**

180 Funnel plot (Figure 3C), Begg's test, and Egger's linear regression test (Figure 3D) were used to  
181 assess publication bias. The results showed that the funnel plots scatter symmetrically. The  
182 statistical tests showed  $P$  values were greater than 0.05 (Begg's test:  $p = 0.4624$ ; Egger's test:  $p =$   
183  $0.329$ ). Thus, there was no obvious publication bias in the prognostic meta-analysis.

## 185 **Validation of TCGA data set results**

186 To validate our result, we retrieved LAMC2 expression data and clinical data from the TCGA  
187 dataset. As shown in Figure 4A, LAMC2 was increased in colon adenocarcinoma (COAD),  
188 lymphoid neoplasm diffuse large B-cell lymphoma (DLBC), esophageal carcinoma (ESCA), head  
189 and neck squamous cell carcinoma (HNSC), lung adenocarcinoma (LUAD), and lung squamous



1  
2  
3  
4 190 cell carcinoma (LUSC), determined using a log<sub>2</sub>FC cutoff of 1 and a *p*-value cutoff of 0.01. A  
5  
6 191 total of 9502 patients with urinary, digestive, female reproductive, respiratory, and blood systems  
7  
8  
9 192 cancers were included in the survival analysis from the TCGA database. According to the  
10  
11 193 expression of LAMC2, the patients were divided into high and low groups using the median score  
12  
13  
14 194 as the cutoff by GEPIA.<sup>21</sup> The results showed that higher LAMC2 expression was correlated with  
15  
16  
17 195 worse survival (Figure 4B). We also explored the prognostic role of LAMC2 in different cancer  
18  
19 196 types. As shown in Figure 5, LAMC2 expression was significantly associated with OS in LUAD  
20  
21  
22 197 (Figure 5A), mesothelioma (MESO, Figure 5B), skin cutaneous melanoma (SKCM, Figure 5C),  
23  
24  
25 198 HNSC (Figure 5D), and brain lower grade glioma (LGG, Figure 5E). However, LAMC2  
26  
27 199 expression was not related to OS in LUSC (Figure 5F).  
28  
29  
30  
31

## 32 201 **DISCUSSION**

33  
34  
35 202 Laminins are involved in various cancer development and prognosis.<sup>25, 26</sup> Increasing evidence  
36  
37 203 suggests that the various laminin isoforms could be useful biomarkers of cancer diagnosis and  
38  
39  
40 204 might be potential therapeutic targets for cancers treatment, such as LAMA5,<sup>27</sup> LAMB1,<sup>28</sup> and  
41  
42  
43 205 LAMC1,<sup>29</sup> LAMC2 is encoding by Laminin  $\gamma$ 2 and has been confirmed as a therapeutic target for  
44  
45  
46 206 cancers. Here we performed a meta-analysis of seven studies to achieve a comprehensive  
47  
48  
49 207 evaluation between higher LAMC2 expression and clinicopathological characteristics in various  
50  
51  
52 208 cancer types. Our results showed that higher LAMC2 expression was significantly associated with  
53  
54  
55 209 LNM, TNM stage, and tumor status. However, there was no significant association between  
56  
57  
58 210 LAMC2 expression and age or gender. Simultaneously, we also found that OS/PFS/DSS was  
59  
60 211 higher in patients with low LAMC2 expression. Publication bias analysis demonstrated that no

1  
2  
3  
4 212 publication bias was observed among the included studies. These results suggested that LAMC2  
5  
6 213 might be a valuable biomarker for predicting prognosis in cancer patients. Steyerberg et al.  
7  
8  
9 214 provide the prognostic model that can provide effective solving discrimination and predictiveness  
10  
11 215 measures.<sup>30</sup> We will plan to investigate this in a later study.  
12  
13

14 216

17 217 Several kinds of research have shown that LAMC2 promotes cancer cells proliferation, motility,  
18  
19 218 and invasion.<sup>29-35</sup> However, the specific mechanism are not particularly well understood. There is  
20  
21 219 a study indicating that ZNF750 inhibited the migration of esophageal squamous cancer cells by  
22  
23 220 inhibiting the LAMC2 transactivation.<sup>31</sup> In hepatocellular carcinoma (HCC), LAMC2 has been  
24  
25 221 found to be regulated by miR-548c-3p and inhibited the epithelial-mesenchymal transition in  
26  
27 222 HCC.<sup>32</sup> In pancreatic cancer cells, LAMC2 promoted Akt-Ser473 phosphorylation and increased  
28  
29 223 expression and cell membrane accumulation of NHE1, promoting cell migration and invasion.<sup>33</sup> A  
30  
31 224 study by Wu et al. showed that the LAMP3-LAMC2-TNC signal regulated the efficacy of  
32  
33 225 radiation exposure in laryngeal squamous cell carcinoma.<sup>34</sup> High-throughput sequencing results  
34  
35 226 showed that miR-338-5p/3p targets LAMC2 to suppress invasion in salivary adenoid cystic  
36  
37 227 carcinoma cells.<sup>35</sup> LAMC2 was found to promote tumor progression by EGFR signaling.<sup>36, 37</sup> The  
38  
39 228 latest research showed that overexpression of LAMC2 enhances pancreatic ductal adenocarcinoma  
40  
41 229 metastasis and tumorigenesis through the EGFR/ERK1/2/AKT/mTOR signaling pathway.<sup>11</sup> These  
42  
43 230 findings suggested that LAMC2 might play as an oncogene and predict prognosis in cancer  
44  
45 231 patients.  
46  
47

48 232

49 233 Recent researches have also investigated LAMC2 as a valuable biomarker of cancer  
50  
51  
52  
53  
54  
55  
56  
57  
58  
59  
60

1  
2  
3  
4 234 diagnosis.<sup>38, 39</sup> Due to a limitation of the small sample size, we explored the expression of LAMC2  
5  
6 235 in various cancer types using the TCGA database. The results showed that LAMC2 was  
7  
8  
9 236 upregulated in tumors and might be used as a biomarker for a variety of tumor types. Moreover,  
10  
11 237 we explore the survival analysis from the TCGA database. The results demonstrated that higher  
12  
13  
14 238 LAMC2 expression was associated with poor OS in 9502 patients. We also explored the  
15  
16  
17 239 prognostic role of LAMC2 in different types of cancer. LAMC2 expression was significantly  
18  
19  
20 240 associated with OS in LUAD, MESO, SKCM, HNSC, and LGG, but not in LUSC. This deserves  
21  
22 241 further investigation.  
23  
24  
25 242

26  
27 243 Some potential limitations of our study should be noted. First, only seven articles were included  
28  
29  
30 244 in our meta-analysis, the limited number of studies might influence the reliability of the results. Of  
31  
32  
33 245 the seven included studies, five were from China, and two were from Japan. So, our results may  
34  
35  
36 246 only be applicable to the Asian population. Although we determined data from the TCGA  
37  
38 247 database, future studies from non-Asian populations are needed to confirm our findings. Second,  
39  
40  
41 248 there was no consensus on a cutoff value for higher LAMC2 expression. Third, in some  
42  
43 249 researches, the data for HR and 95% CI value was not provided. Although we tried our best to  
44  
45  
46 250 extract the HR and 95% CI value from the Kaplan-Meier curve, some errors are inevitable. Fourth,  
47  
48  
49 251 the numbers of patients and tumor types included in this meta-analysis were still limited. So, our  
50  
51 252 results may exaggerate the prognostic value of LAMC2.  
52  
53  
54 253

## 55 254 **CONCLUSIONS**

56  
57  
58 255 In conclusion, LAMC2 may be a valuable biomarker for cancer diagnosis, and upregulation of  
59  
60

1  
2  
3  
4 256 LAMC2 is associated with a poor prognosis in cancer patients. And increased LAMC2 expression  
5  
6 257 was significantly associated with bad tumor status, tumor-node-metastasis stages, and lymph node  
7  
8  
9 258 metastasis. For future clinical applications, more high-quality studies with large sample sizes are  
10  
11 259 needed to confirm the role of LAMC2 in various cancers and regions.  
12

13  
14 260

#### 17 261 **Acknowledgments**

18  
19 262 We sincerely thank Dr. Yang Wu for her support in this study.  
20  
21

22 263

#### 25 264 **Contributors**

26  
27 265 T.F and Z.-S.Y designed the study; T.F, Z.-S.Y, and J.X searched the literature and extracted data;  
28  
29 266 Z.-S.Y and T.F analyzed data; Z.-S.Y prepared the figures; Z.-S.Y, J.-X.L, and Z.G. wrote the  
30  
31 267 manuscript. All authors gave the final approval for the paper to be published.  
32  
33

34 268

#### 37 269 **Funding**

38  
39 270 This study was supported by the Chongqing Science and Health Joint Project (2021MSXM108).  
40  
41

42 271

#### 45 272 **Competing interests**

46  
47 273 The authors declare that they have no conflict of interest  
48  
49

#### 50 274 **Patient consent for publication**

51  
52 275 Not applicable.  
53  
54

55 276

#### 58 277 **Ethics approval**

59  
60

1  
2  
3  
4  
5  
6  
7  
8  
9  
10  
11  
12  
13  
14  
15  
16  
17  
18  
19  
20  
21  
22  
23  
24  
25  
26  
27  
28  
29  
30  
31  
32  
33  
34  
35  
36  
37  
38  
39  
40  
41  
42  
43  
44  
45  
46  
47  
48  
49  
50  
51  
52  
53  
54  
55  
56  
57  
58  
59  
60

278 This study does not involve human participants.

279

#### 280 **Data availability statement**

281 All data relevant to the study are included in the article.

282

#### 283 **Abbreviations**

284 CI, confidence interval; COAD, colon adenocarcinoma; DLBS, lymphoid neoplasm diffuse large

285 B-cell lymphoma; DSS, disease-specific survival; ESCA, esophageal carcinoma; GEPIA, gene

286 expression profiling interactive analysis; HCC, hepatocellular carcinoma; HNSC, head and neck

287 squamous cell carcinoma; HR, hazard ratio; IHC, immunocytochemistry; LAMC2, laminin

288 subunit gamma 2; LGG, brain lower grade glioma; LUAD, lung adenocarcinoma; LUSC, lung

289 squamous cell carcinoma; MESO, mesothelioma; NOS, Newcastle-Ottawa Quality Assessment

290 Scale; OR, odds ratio; OS, overall survival; PFS, progression-free survival; qRT-PCR,

291 quantitative real-time polymerase chain reaction; RNA-seq, RNA sequencing; SKCM, skin

292 cutaneous melanoma; TCGA, The Cancer Genome Atlas; TNM, tumor-node-metastasis.

293

#### 294 **ORCID iD**

295 Zhen-Shan Yang <https://orcid.org/0000-0001-6987-9947>

296

#### 297 **REFERENCES**

298 1 Aumailley M. The laminin family. *Cell Adh Migr*. 2013;7(1):48-55.

299 2 Hohenester E. Structural biology of laminins. *Essays Biochem*. 2019;63(3):285-295.

- 1  
2  
3  
4 300 3 Yao Y. Laminin: loss-of-function studies. *Cell Mol Life Sci.* 2017;74(6):1095-1115.  
5  
6  
7 301 4 Yap L, Tay HG, Nguyen M, *et al.* Laminins in Cellular Differentiation. *Trends Cell Biol.*  
8  
9 302 2019;29(12):987-1000.  
10  
11 303 5 Durbeej M. Laminins. *Cell Tissue Res.* 2010;339(1):259-68.  
12  
13  
14 304 6 Huang D, Du C, Ji D, *et al.* Overexpression of LAMC2 predicts poor prognosis in colorectal  
15  
16  
17 305 cancer patients and promotes cancer cell proliferation, migration, and invasion. *Tumour Biol.*  
18  
19 306 2017;39(6):1010428317705849.  
20  
21  
22 307 7 Okada Y, Takahashi N, Takayama T, *et al.* LAMC2 promotes cancer progression and  
23  
24  
25 308 gemcitabine resistance through modulation of EMT and ATP-binding cassette transporters in  
26  
27 309 pancreatic ductal adenocarcinoma. *Carcinogenesis.* 2021;42(4):546-556.  
28  
29  
30 310 8 Yang C, Liu Z, Zeng X *et al.* Evaluation of the diagnostic ability of laminin gene family for  
31  
32 311 pancreatic ductal adenocarcinoma. *Aging (Albany NY).* 2019;11(11):3679-3703.  
33  
34  
35 312 9 Islam S, Kitagawa T, Baron B *et al.* ITGA2, LAMB3, and LAMC2 may be the potential  
36  
37 313 therapeutic targets in pancreatic ductal adenocarcinoma: an integrated bioinformatics analysis.  
38  
39 314 *Sci Rep.* 2021;11(1):10563.  
40  
41  
42 315 10 Jin G, Ruan Q, Shangguan F, *et al.* RUNX2 and LAMC2: promising pancreatic cancer  
43  
44 316 biomarkers identified by an integrative data mining of pancreatic adenocarcinoma tissues.  
45  
46 317 *Aging (Albany NY).* 2021;13(19):22963-22984.  
47  
48  
49 318 11 Kirtonia A, Pandey AK, Ramachandran B, *et al.* Overexpression of laminin-5 gamma-2  
50  
51 319 promotes tumorigenesis of pancreatic ductal adenocarcinoma through  
52  
53 320 EGFR/ERK1/2/AKT/mTOR cascade. *Cell Mol Life Sci.* 2022;79(7):362.  
54  
55  
56 321 12 Liu M, Cai R, Wang T *et al.* LAMC2 promotes the proliferation of cancer cells and induce  
57  
58  
59  
60

1  
2  
3  
4  
5  
6  
7  
8  
9  
10  
11  
12  
13  
14  
15  
16  
17  
18  
19  
20  
21  
22  
23  
24  
25  
26  
27  
28  
29  
30  
31  
32  
33  
34  
35  
36  
37  
38  
39  
40  
41  
42  
43  
44  
45  
46  
47  
48  
49  
50  
51  
52  
53  
54  
55  
56  
57  
58  
59  
60

- 322 infiltration of macrophages in non-small cell lung cancer. *Ann Transl Med.* 2021;9(17):1392.
- 323 13 Zhou QH, Deng CZ, Chen JP *et al.* Elevated serum LAMC2 is associated with lymph node  
324 metastasis and predicts poor prognosis in penile squamous cell carcinoma. *Cancer Manag Res.*  
325 2018;10:2983-2995.
- 326 14 Diao B, Yang P. Comprehensive Analysis of the Expression and Prognosis for Laminin Genes  
327 in Ovarian Cancer. *Pathol Oncol Res.* 2021;27:1609855.
- 328 15 Thangaraj SV, Shyamsundar V, Krishnamurthy A, *et al.* Deregulation of extracellular matrix  
329 modeling with molecular prognostic markers revealed by transcriptome sequencing and  
330 validations in Oral Tongue squamous cell carcinoma. *Sci Rep.* 2021;11(1):250.
- 331 16 Pei YF, Liu J, Cheng J, *et al.* Silencing of LAMC2 Reverses Epithelial-Mesenchymal  
332 Transition and Inhibits Angiogenesis in Cholangiocarcinoma via Inactivation of the Epidermal  
333 Growth Factor Receptor Signaling Pathway. *Am J Pathol.* 2019;189(8):1637-1653.
- 334 17 Liang Y, Chen X, Wu Y *et al.* LncRNA CASC9 promotes esophageal squamous cell  
335 carcinoma metastasis through upregulating LAMC2 expression by interacting with the  
336 CREB-binding protein. *Cell Death Differ.* 2018;25(11):1980-1995.
- 337 18 Page MJ, McKenzie JE, Bossuyt PM, *et al.* The PRISMA 2020 statement: an updated guideline  
338 for reporting systematic reviews. *BMJ.* 2021;372:n71.
- 339 19 Stang A. Critical evaluation of the Newcastle-Ottawa scale for the assessment of the quality of  
340 nonrandomized studies in meta-analyses. *Eur J Epidemiol.* 2010;25(9):603-5.
- 341 20 Tierney JF, Stewart LA, Ghersi D, *et al.* Practical methods for incorporating summary  
342 time-to-event data into meta-analysis. *Trials.* 2007;8:16.
- 343 21 Tang Z, Li C, Kang B *et al.* GEPIA: a web server for cancer and normal gene expression

- 1  
2  
3  
4 344 profiling and interactive analyses. *Nucleic Acids Res.* 2017;45(W1):W98-W102.  
5  
6  
7 345 22 Okada Y, Nishiwada S, Yamamura K *et al.* Identification of laminin  $\gamma$ 2 as a prognostic and  
8  
9 346 predictive biomarker for determining response to gemcitabine-based therapy in pancreatic  
10  
11 347 ductal adenocarcinoma. *Eur J Cancer.* 2021;146:125-134.  
12  
13  
14 348 23 Zhan S, Wang T, Wang M, *et al.* In-Depth Proteomics Analysis to Identify Biomarkers of  
15  
16 349 Papillary Thyroid Cancer Patients Older Than 45 Years with Different Degrees of Lymph  
17  
18 350 Node Metastases. *Proteomics Clin Appl.* 2019;13(5):e1900030.  
19  
20  
21 351 24 Zhou QH, Deng CZ, Chen JP *et al.* Elevated serum LAMC2 is associated with lymph node  
22  
23 352 metastasis and predicts poor prognosis in penile squamous cell carcinoma. *Cancer Manag Res.*  
24  
25 353 2018;10:2983-2995.  
26  
27  
28 354 25 Garg M, Braunstein G, Koeffler HP. LAMC2 as a therapeutic target for cancers. *Expert Opin*  
29  
30 355 *Ther Targets.* 2014;18(9):979-82.  
31  
32  
33 356 26 Givant-Horwitz V, Davidson B, Reich R. Laminin-induced signaling in tumor cells. *Cancer*  
34  
35 357 *Lett.* 2005;223(1):1-10.  
36  
37  
38 358 27 Diao B, Yang P. Comprehensive Analysis of the Expression and Prognosis for Laminin Genes  
39  
40 359 in Ovarian Cancer. *Pathol Oncol Res.* 2021;27:1609855.  
41  
42  
43 360 28 Ran T, Chen Z, Zhao L *et al.* LAMB1 Is Related to the T Stage and Indicates Poor Prognosis in  
44  
45 361 Gastric Cancer. *Technol Cancer Res Treat.* 2021;20:15330338211004944.  
46  
47  
48 362 29 Kashima H, Wu RC, Wang Y *et al.* Laminin C1 expression by uterine carcinoma cells is  
49  
50 363 associated with tumor progression. *Gynecol Oncol.* 2015;139(2):338-44.  
51  
52  
53 364 30 Steyerberg EW, Vickers AJ, Cook NR, *et al.* Assessing the performance of prediction models:  
54  
55 365 a framework for traditional and novel measures. *Epidemiology.* 2010;21(1):128-138.  
56  
57  
58  
59  
60



1  
2  
3  
4  
5  
6  
7  
8  
9  
10  
11  
12  
13  
14  
15  
16  
17  
18  
19  
20  
21  
22  
23  
24  
25  
26  
27  
28  
29  
30  
31  
32  
33  
34  
35  
36  
37  
38  
39  
40  
41  
42  
43  
44  
45  
46  
47  
48  
49  
50  
51  
52  
53  
54  
55  
56  
57  
58  
59  
60

- 366 31 Hazawa M, Lin DC, Handral H *et al.* ZNF750 is a lineage-specific tumour suppressor in  
367 squamous cell carcinoma. *Oncogene*. 2017;36(16):2243-2254.
- 368 32 Jin J, Liu H, Jin M *et al.* Silencing of hsa\_circ\_0101145 reverses the epithelial-mesenchymal  
369 transition in hepatocellular carcinoma via regulation of the miR-548c-3p/LAMC2 axis. *Aging*  
370 (*Albany NY*). 2020;12(12):11623-11635.
- 371 33 Wang H, Cai J, Du S, *et al.* LAMC2 modulates the acidity of microenvironments to promote  
372 invasion and migration of pancreatic cancer cells via regulating AKT-dependent NHE1  
373 activity. *Exp Cell Res*. 2020;391(1):111984.
- 374 34 Wu H, Li J, Chen J *et al.* Efficacy of radiation exposure in laryngeal squamous cell carcinoma  
375 is mediated by the LAMP3/LAMC2/tenascin-C pathway. *Exp Biol Med (Maywood)*.  
376 2019;244(13):1070-1080.
- 377 35 Wang S, Zhang L, Shi P *et al.* Genome-wide profiles of metastasis-associated mRNAs and  
378 microRNAs in salivary adenoid cystic carcinoma. *Biochem Biophys Res Commun*.  
379 2018;500(3):632-638.
- 380 36 Garg M, Kanojia D, Okamoto R *et al.* Laminin-5  $\gamma$  -2 (LAMC2) is highly expressed in  
381 anaplastic thyroid carcinoma and is associated with tumor progression, migration, and invasion  
382 by modulating signaling of EGFR. *J Clin Endocrinol Metab*. 2014;99(1):E62-72.
- 383 37 Daisuke H, Kato H, Fukumura K *et al.* Novel LAMC2 fusion protein has tumor-promoting  
384 properties in ovarian carcinoma. *Cancer Sci*. 2021;112(12):4957-4967.
- 385 38 Shokati EZ, Khayer N, Talebi A, *et al.* Novel insight into pancreatic adenocarcinoma  
386 pathogenesis using liquid association analysis. *Bmc Med Genomics*. 2022;15(1):30.
- 387 39 You GR, Cheng AJ, Lee LY *et al.* Prognostic signature associated with radioresistance in head

1  
2  
3  
4 388 and neck cancer via transcriptomic and bioinformatic analyses. *Bmc Cancer*. 2019;19(1):64.  
5  
6

7 389

8  
9 390 **Figure legends**

10  
11 391 **Figure 1 Flow diagram of the literature search and selection**

12  
13  
14 392

15  
16  
17 393 **Figure 2 Forest plots of studies evaluating the relationship between LAMC2 expression and**  
18  
19 394 **clinicopathological features**

20  
21  
22 395 (A) LNM, (B) TNM stage, (C) tumor status, (D) gender, (E) age.  
23  
24

25 396

26  
27 397 **Figure 3 The relationship between LAMC2 expression and OS/PFS/DSS**

28  
29  
30 398 (A) Forest plot for the meta-analysis of OS/PFS/DSS. (B) Sensitivity analysis for LAMC2  
31  
32 399 expression with OS/PFS/DSS. (C) Funnel plot for the meta-analysis of OS/PFS/DSS. (D) Egger's  
33  
34 400 graph for analyzing publication bias.  
35  
36

37 401

38  
39  
40 402 **Figure 4 The expression of LAMC2 in the TCGA database**

41  
42  
43 403 (A) LAMC2 expression in COAD, DLBC, ESCA, HNSC, LUAD, and LUSC. \* =  $p$  value < 0.01.  
44

45 404 (B) OS rate of LAMC2 expression in TCGA database (n = 9502). Gray boxes indicate normal,  
46  
47 405 and red boxes indicate tumor. T, tumor; N, normal.  
48  
49

50 406

51  
52  
53 407 **Figure 5 Kaplan-Meier curves showing the prognostic value of LAMC2 in the TCGA**  
54  
55 408 **database**

56  
57  
58 409 (A) LUAD, (B) MESO, (C) SKCM, (D) HNSC, (E) LGG, (F) LUSC.  $p$  values were calculated  
59  
60

1  
2  
3  
4  
5  
6  
7  
8  
9  
10  
11  
12  
13  
14  
15  
16  
17  
18  
19  
20  
21  
22  
23  
24  
25  
26  
27  
28  
29  
30  
31  
32  
33  
34  
35  
36  
37  
38  
39  
40  
41  
42  
43  
44  
45  
46  
47  
48  
49  
50  
51  
52  
53  
54  
55  
56  
57  
58  
59  
60

410 using the log-rank test.

For peer review only

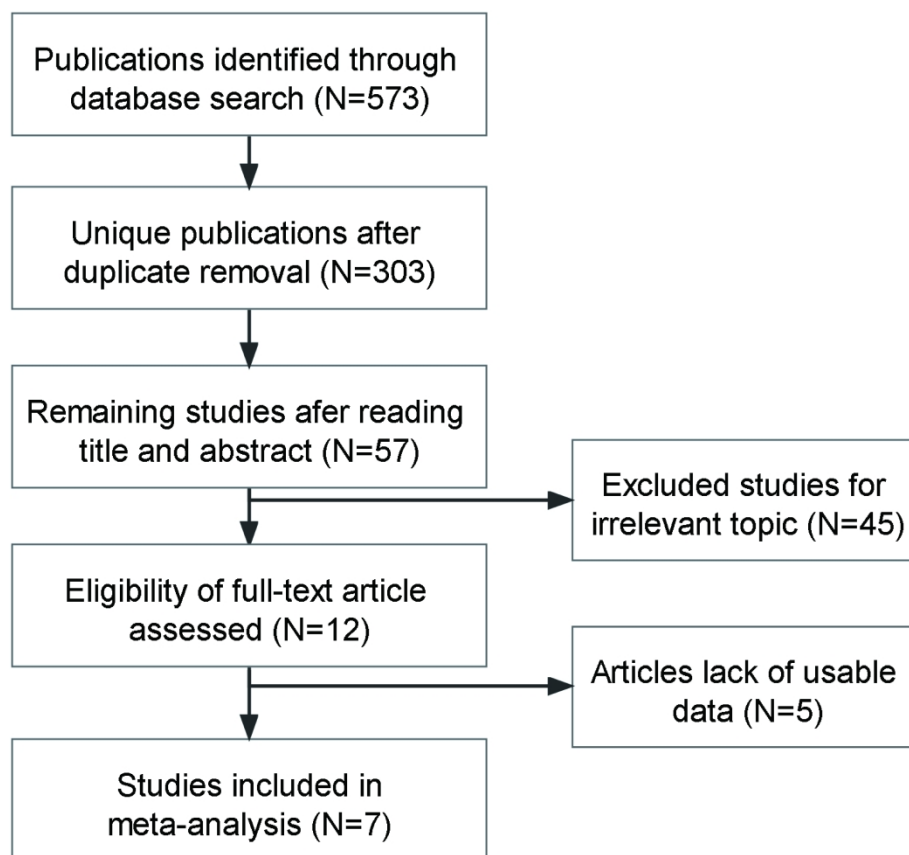

Figure1

170x158mm (600 x 600 DPI)

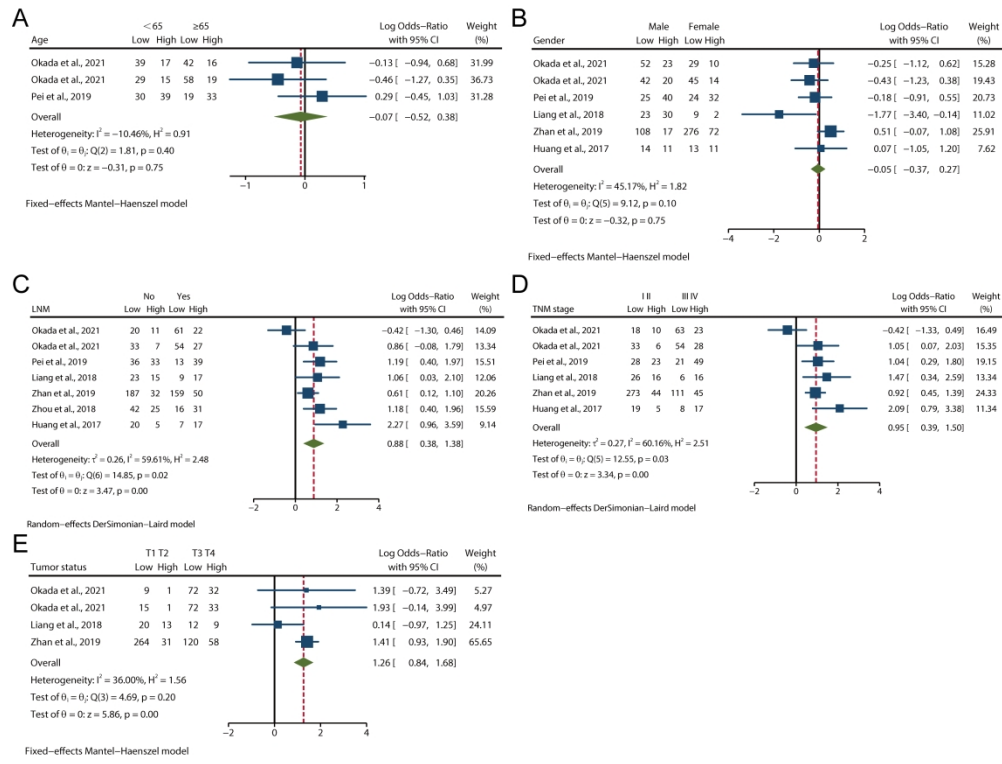

Figure 2

168x126mm (600 x 600 DPI)

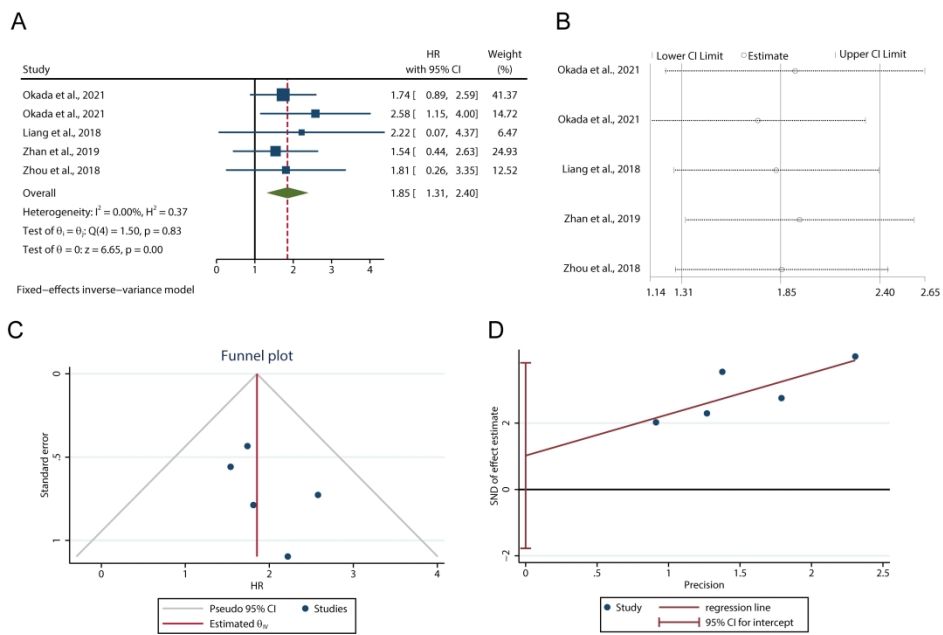

Figure 3

177x110mm (600 x 600 DPI)

1  
2  
3  
4  
5  
6  
7  
8  
9  
10  
11  
12  
13  
14  
15  
16  
17  
18  
19  
20  
21  
22  
23  
24  
25  
26  
27  
28  
29  
30  
31  
32  
33  
34  
35  
36  
37  
38  
39  
40  
41  
42  
43  
44  
45  
46  
47  
48  
49  
50  
51  
52  
53  
54  
55  
56  
57  
58  
59  
60

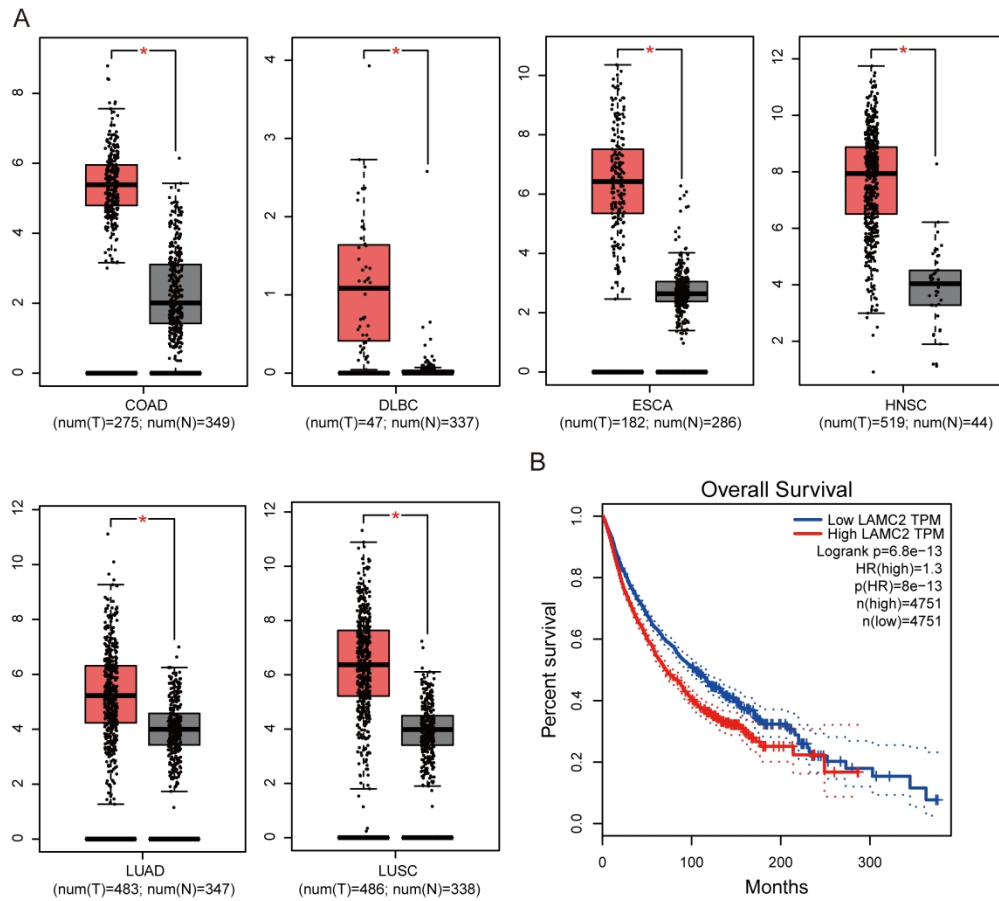

Figure4

166x148mm (600 x 600 DPI)

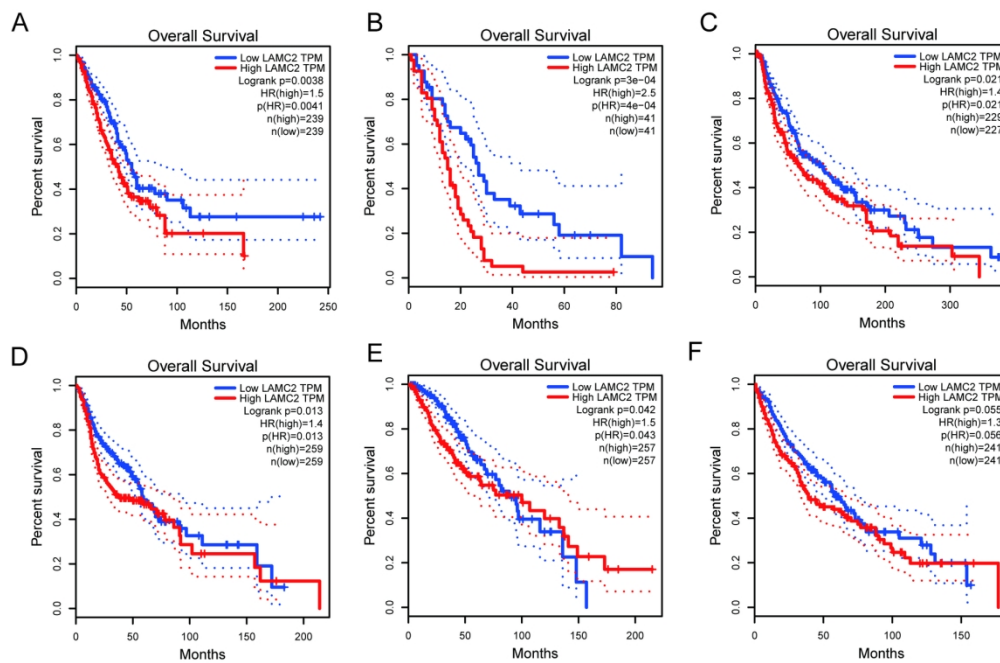

Figure5

162x106mm (300 x 300 DPI)



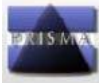

PRISMA 2020 Checklist

1  
2  
3  
4  
5  
6  
7  
8  
9  
10  
11  
12  
13  
14  
15  
16  
17  
18  
19  
20  
21  
22  
23  
24  
25  
26  
27  
28  
29  
30  
31  
32  
33  
34  
35  
36  
37  
38  
39  
40  
41  
42  
43  
44  
45  
46  
47

| Section and Topic             | Item # | Checklist item                                                                                                                                                                                                                                                                                       | Location where item is reported |
|-------------------------------|--------|------------------------------------------------------------------------------------------------------------------------------------------------------------------------------------------------------------------------------------------------------------------------------------------------------|---------------------------------|
| <b>TITLE</b>                  |        |                                                                                                                                                                                                                                                                                                      |                                 |
| Title                         | 1      | Identify the report as a systematic review.                                                                                                                                                                                                                                                          | Page 1                          |
| <b>ABSTRACT</b>               |        |                                                                                                                                                                                                                                                                                                      |                                 |
| Abstract                      | 2      | See the PRISMA 2020 for Abstracts checklist.                                                                                                                                                                                                                                                         | Page 1                          |
| <b>INTRODUCTION</b>           |        |                                                                                                                                                                                                                                                                                                      |                                 |
| Rationale                     | 3      | Describe the rationale for the review in the context of existing knowledge.                                                                                                                                                                                                                          | Page 3                          |
| Objectives                    | 4      | Provide an explicit statement of the objective(s) or question(s) the review addresses.                                                                                                                                                                                                               | Page 3                          |
| <b>METHODS</b>                |        |                                                                                                                                                                                                                                                                                                      |                                 |
| Eligibility criteria          | 5      | Specify the inclusion and exclusion criteria for the review and how studies were grouped for the syntheses.                                                                                                                                                                                          | Page 4                          |
| Information sources           | 6      | Specify all databases, registers, websites, organisations, reference lists and other sources searched or consulted to identify studies. Specify the date when each source was last searched or consulted.                                                                                            | Page 4                          |
| Search strategy               | 7      | Present the full search strategies for all databases, registers and websites, including any filters and limits used.                                                                                                                                                                                 | Page 4                          |
| Selection process             | 8      | Specify the methods used to decide whether a study met the inclusion criteria of the review, including how many reviewers screened each record and each report retrieved, whether they worked independently, and if applicable, details of automation tools used in the process.                     | Page 5                          |
| Data collection process       | 9      | Specify the methods used to collect data from reports, including how many reviewers collected data from each report, whether they worked independently, any processes for obtaining or confirming data from study investigators, and if applicable, details of automation tools used in the process. | Page 5                          |
| Data items                    | 10a    | List and define all outcomes for which data were sought. Specify whether all results that were compatible with each outcome domain in each study were sought (e.g. for all measures, time points, analyses), and if not, the methods used to decide which results to collect.                        | Page 5                          |
|                               | 10b    | List and define all other variables for which data were sought (e.g. participant and intervention characteristics, funding sources). Describe any assumptions made about any missing or unclear information.                                                                                         | Page 5                          |
| Study risk of bias assessment | 11     | Specify the methods used to assess risk of bias in the included studies, including details of the tool(s) used, how many reviewers assessed each study and whether they worked independently, and if applicable, details of automation tools used in the process.                                    | Page 6                          |
| Effect measures               | 12     | Specify for each outcome the effect measure(s) (e.g. risk ratio, mean difference) used in the synthesis or presentation of results.                                                                                                                                                                  | Page 6                          |
| Synthesis methods             | 13a    | Describe the processes used to decide which studies were eligible for each synthesis (e.g. tabulating the study intervention characteristics and comparing against the planned groups for each synthesis (item #5)).                                                                                 | Page 4                          |
|                               | 13b    | Describe any methods required to prepare the data for presentation or synthesis, such as handling of missing summary statistics, or data conversions.                                                                                                                                                | Page 5                          |
|                               | 13c    | Describe any methods used to tabulate or visually display results of individual studies and syntheses.                                                                                                                                                                                               | Page 5                          |
|                               | 13d    | Describe any methods used to synthesize results and provide a rationale for the choice(s). If meta-analysis was performed, describe the model(s), method(s) to identify the presence and extent of statistical heterogeneity, and software package(s) used.                                          | Page 6                          |
|                               | 13e    | Describe any methods used to explore possible causes of heterogeneity among study results (e.g. subgroup analysis, meta-regression).                                                                                                                                                                 | -                               |
|                               | 13f    | Describe any sensitivity analyses conducted to assess robustness of the synthesized results.                                                                                                                                                                                                         | Page 6                          |
| Reporting bias assessment     | 14     | Describe any methods used to assess risk of bias due to missing results in a synthesis (arising from reporting biases).                                                                                                                                                                              | Page 6                          |
| Certainty assessment          | 15     | Describe any methods used to assess certainty (or confidence) in the body of evidence for an outcome.<br>For peer review only - <a href="http://bmjopen.bmj.com/site/about/guidelines.xhtml">http://bmjopen.bmj.com/site/about/guidelines.xhtml</a>                                                  | Page 6                          |



## PRISMA 2020 Checklist

1  
2  
3  
4  
5  
6  
7  
8  
9  
10  
11  
12  
13  
14  
15  
16  
17  
18  
19  
20  
21  
22  
23  
24  
25  
26  
27  
28  
29  
30  
31  
32  
33  
34  
35  
36  
37  
38  
39  
40  
41  
42  
43  
44  
45  
46  
47

| Section and Topic                              | Item # | Checklist item                                                                                                                                                                                                                                                                       | Location where item is reported |
|------------------------------------------------|--------|--------------------------------------------------------------------------------------------------------------------------------------------------------------------------------------------------------------------------------------------------------------------------------------|---------------------------------|
| <b>RESULTS</b>                                 |        |                                                                                                                                                                                                                                                                                      |                                 |
| Study selection                                | 16a    | Describe the results of the search and selection process, from the number of records identified in the search to the number of studies included in the review, ideally using a flow diagram.                                                                                         | Page 6                          |
|                                                | 16b    | Cite studies that might appear to meet the inclusion criteria, but which were excluded, and explain why they were excluded.                                                                                                                                                          | Page 6                          |
| Study characteristics                          | 17     | Cite each included study and present its characteristics.                                                                                                                                                                                                                            | Page 6                          |
| Risk of bias in studies                        | 18     | Present assessments of risk of bias for each included study.                                                                                                                                                                                                                         | Page 8                          |
| Results of individual studies                  | 19     | For all outcomes, present, for each study: (a) summary statistics for each group (where appropriate) and (b) an effect estimate and its precision (e.g. confidence/credible interval), ideally using structured tables or plots.                                                     | Page 7                          |
| Results of syntheses                           | 20a    | For each synthesis, briefly summarise the characteristics and risk of bias among contributing studies.                                                                                                                                                                               | Page 8                          |
|                                                | 20b    | Present results of all statistical syntheses conducted. If meta-analysis was done, present for each the summary estimate and its precision (e.g. confidence/credible interval) and measures of statistical heterogeneity. If comparing groups, describe the direction of the effect. | Page 7                          |
|                                                | 20c    | Present results of all investigations of possible causes of heterogeneity among study results.                                                                                                                                                                                       | Page 7                          |
|                                                | 20d    | Present results of all sensitivity analyses conducted to assess the robustness of the synthesized results.                                                                                                                                                                           | Page 8                          |
| Reporting biases                               | 21     | Present assessments of risk of bias due to missing results (arising from reporting biases) for each synthesis assessed.                                                                                                                                                              | Page 8                          |
| Certainty of evidence                          | 22     | Present assessments of certainty (or confidence) in the body of evidence for each outcome assessed.                                                                                                                                                                                  | Page 8                          |
| <b>DISCUSSION</b>                              |        |                                                                                                                                                                                                                                                                                      |                                 |
| Discussion                                     | 23a    | Provide a general interpretation of the results in the context of other evidence.                                                                                                                                                                                                    | Page 9                          |
|                                                | 23b    | Discuss any limitations of the evidence included in the review.                                                                                                                                                                                                                      | Page 11                         |
|                                                | 23c    | Discuss any limitations of the review processes used.                                                                                                                                                                                                                                | Page 11                         |
|                                                | 23d    | Discuss implications of the results for practice, policy, and future research.                                                                                                                                                                                                       | Page 12                         |
| <b>OTHER INFORMATION</b>                       |        |                                                                                                                                                                                                                                                                                      |                                 |
| Registration and protocol                      | 24a    | Provide registration information for the review, including register name and registration number, or state that the review was not registered.                                                                                                                                       | Page 4                          |
|                                                | 24b    | Indicate where the review protocol can be accessed, or state that a protocol was not prepared.                                                                                                                                                                                       | Page 4                          |
|                                                | 24c    | Describe and explain any amendments to information provided at registration or in the protocol.                                                                                                                                                                                      | Page 4                          |
| Support                                        | 25     | Describe sources of financial or non-financial support for the review, and the role of the funders or sponsors in the review.                                                                                                                                                        | Page 12                         |
| Competing interests                            | 26     | Declare any competing interests of review authors.                                                                                                                                                                                                                                   | Page 12                         |
| Availability of data, code and other materials | 27     | Report which of the following are publicly available and where they can be found: template data collection forms; data extracted from included studies; data used for all analyses; analytic code; any other materials used in the review.                                           | Page 13                         |

From: Page MJ, McKenzie JE, Bossuyt PM, Boutron I, Hoffmann TC, Mulrow CD, et al. The PRISMA 2020 statement: an updated guideline for reporting systematic reviews. *BMJ* 2021;372:n71. doi: 10.1136/bmj.n71

For peer review only - <http://bmjopen.bmj.com/site/about/guidelines.xhtml>  
For more information, visit: <http://www.prisma-statement.org>

**Search strategy for PubMed** (search date: from inception to 25 November 2021).

((("laminin"[MeSH Terms] OR "laminin"[All Fields] OR "laminins"[All Fields] OR "laminine"[Supplementary Concept] OR "laminine"[All Fields]) AND "C2"[All Fields]) OR "LAMC2"[All Fields] OR ((("laminin"[MeSH Terms] OR "laminin"[All Fields] OR "laminins"[All Fields] OR "laminine"[Supplementary Concept] OR "laminine"[All Fields]) AND ("protein subunits"[MeSH Terms] OR ("protein"[All Fields] AND "subunits"[All Fields]) OR "protein subunits"[All Fields] OR "subunit"[All Fields] OR "subunit s"[All Fields] OR "subunits"[All Fields]) AND ("gamma rays"[MeSH Terms] OR ("gamma"[All Fields] AND "rays"[All Fields]) OR "gamma rays"[All Fields] OR "gamma"[All Fields] OR "gamma s"[All Fields] OR "gammae"[All Fields] OR "gammas"[All Fields]) AND "2"[All Fields])) AND ("prognosis"[MeSH Terms] OR "prognosis"[All Fields] OR "prognoses"[All Fields] OR ("prognostic"[All Fields] OR "prognostical"[All Fields] OR "prognostically"[All Fields] OR "prognosticate"[All Fields] OR "prognosticated"[All Fields] OR "prognosticates"[All Fields] OR "prognosticating"[All Fields] OR "prognostication"[All Fields] OR "prognostications"[All Fields] OR "prognosticator"[All Fields] OR "prognosticators"[All Fields] OR "prognostics"[All Fields]) OR ("mortality"[MeSH Subheading] OR "mortality"[All Fields] OR "survival"[All Fields] OR "survival"[MeSH Terms] OR "survivability"[All Fields] OR "survivable"[All Fields] OR "survivals"[All Fields] OR "survive"[All Fields] OR "survived"[All Fields] OR "survives"[All Fields] OR "surviving"[All Fields]))

**Search strategy for the Embase** (search date: from inception to 25 November 2021).

('laminin c2' OR (('laminin'/exp OR laminin) AND ('c2'/exp OR c2)) OR lamc2 OR 'laminin subunit gamma 2'/exp OR 'laminin subunit gamma 2' OR (('laminin'/exp OR laminin) AND subunit AND gamma AND ('2'/exp OR 2))) AND ('prognosis'/exp OR prognosis OR prognostic OR 'survival'/exp OR survival)

**Search strategy for Web of Science** (search date: from inception to 25 November 2021)

TS=((laminin C2 OR LAMC2 OR laminin subunit gamma 2) AND (prognosis OR prognostic OR survival))
