# Supplementary material for: LAMC2 as a prognostic biomarker in human cancer: a systematic review and meta-analysis
Source: PubMed Central journal article supplement — BMJ Open. 2022 Nov 16;12(11):e063682. doi: 10.1136/bmjopen-2022-063682 (PMC9677043; doi:10.1136/bmjopen-2022-063682), 2022-11-16
Supplement: bmjopen-2022-063682supp001.pdf [file bmjopen-2022-063682supp001.pdf]

**Search strategy for PubMed** (search date: from inception to 25 November 2021).

((("laminin"[MeSH Terms] OR "laminin"[All Fields] OR "laminins"[All Fields] OR "laminine"[Supplementary Concept] OR "laminine"[All Fields]) AND "C2"[All Fields]) OR "LAMC2"[All Fields] OR (("laminin"[MeSH Terms] OR "laminin"[All Fields] OR "laminins"[All Fields] OR "laminine"[Supplementary Concept] OR "laminine"[All Fields]) AND ("protein subunits"[MeSH Terms] OR ("protein"[All Fields] AND "subunits"[All Fields]) OR "protein subunits"[All Fields] OR "subunit"[All Fields] OR "subunit s"[All Fields] OR "subunits"[All Fields]) AND ("gamma rays"[MeSH Terms] OR ("gamma"[All Fields] AND "rays"[All Fields]) OR "gamma rays"[All Fields] OR "gamma"[All Fields] OR "gamma s"[All Fields] OR "gammae"[All Fields] OR "gammas"[All Fields]) AND "2"[All Fields])) AND ("prognosis"[MeSH Terms] OR "prognosis"[All Fields] OR "prognoses"[All Fields] OR ("prognostic"[All Fields] OR "prognostical"[All Fields] OR "prognostically"[All Fields] OR "prognosticate"[All Fields] OR "prognosticated"[All Fields] OR "prognosticates"[All Fields] OR "prognosticating"[All Fields] OR "prognostication"[All Fields] OR "prognostications"[All Fields] OR "prognosticator"[All Fields] OR "prognosticators"[All Fields] OR "prognostics"[All Fields]) OR ("mortality"[MeSH Subheading] OR "mortality"[All Fields] OR "survival"[All Fields] OR "survival"[MeSH Terms] OR "survivability"[All Fields] OR "survivable"[All Fields] OR "survivals"[All Fields] OR "survive"[All Fields] OR "survived"[All Fields] OR "survives"[All Fields] OR "surviving"[All Fields]))

**Search strategy for the Embase** (search date: from inception to 25 November 2021).

('laminin c2' OR (('laminin'/exp OR laminin) AND ('c2'/exp OR c2)) OR lamc2 OR 'laminin subunit gamma 2'/exp OR 'laminin subunit gamma 2' OR (('laminin'/exp OR laminin) AND subunit AND gamma AND ('2'/exp OR 2))) AND ('prognosis'/exp OR prognosis OR prognostic OR 'survival'/exp OR survival)

**Search strategy for Web of Science** (search date: from inception to 25 November 2021)

TS=((laminin C2 OR LAMC2 OR laminin subunit gamma 2) AND (prognosis OR prognostic OR survival))
